# Supplementary material for: Virtual Simulated Placements in Healthcare Education: A scoping review
Source: bioRxiv or medRxiv preprint supplement (doi:10.1101/2023.10.12.23296932), 2023-10-12
Supplement: Supplementary file [file media-4.pdf]

## Supplementary File A3: Screening Decisions

Initial Search:

### Database Records Breakdown

| Databases              | Results |
|------------------------|---------|
| AMED                   | 1       |
| BioMed Central         | 2       |
| CINAHL                 | 159     |
| Cochrane               | 125     |
| ERIC                   | 6       |
| EthOS                  | 2       |
| Google Scholar         | 80      |
| IEEE Xplore            | 264     |
| MEDLINE                | 880     |
| ProQuest Dissertations | 15      |
| PsychINFO              | 32      |
| PubMed                 | 611     |
| Science Direct         | 11      |
| Scopus                 | 5       |
| Total                  | 2193    |

## Database search papers screened out at full text stage, with reasons for exclusion

| Reference                                                                                                                                                                                                                                                                         | Reason              | Comments                                                                                                                                                                |
|-----------------------------------------------------------------------------------------------------------------------------------------------------------------------------------------------------------------------------------------------------------------------------------|---------------------|-------------------------------------------------------------------------------------------------------------------------------------------------------------------------|
| Addis, B., et al. (2022). "Virtual elective placements for medical students during COVID-19." <i>Medical Education</i> <b>56</b> (5): 576-577.                                                                                                                                    | Wrong Research Type | Commentary piece. Also consisted of observing cases over video conferencing. No outcome measures reported.                                                              |
| Aster, A., et al. (2022). "Use of a Serious Game to Teach Infectious Disease Management in Medical School: effectiveness and Transfer to a Clinical Examination." <i>Frontiers in medicine</i> <b>9</b> .                                                                         | Wrong Concept       | The aim was to compare it to an OSCE and see if it could substitute - so it's about assessment                                                                          |
| Betts, L., et al. (2020). "Using Virtual Interactive Digital Simulator to Enhance Simulation Experiences for Undergraduate Nursing Students." <i>Nursing education perspectives</i> <b>41</b> (3): 193-194.                                                                       | Wrong Concept       | Patient simulator in a touch-table format for simulations in a centre                                                                                                   |
| Bradford, H. M., et al. (2021). "Rapid Curricular Innovations During COVID-19 Clinical Suspension: Maintaining Student Engagement with Simulation Experiences." <i>Journal of midwifery &amp; women's health</i> <b>66</b> (3): 366-371.                                          | Wrong Research Type | There were several innovations but not one set VSP described - aside from the OSCEs, many of the activities were optional and could substitute for some clinical hours. |
| Cárdenas-Cruz, A., et al. (2022). "An example of adaptation: experience of virtual clinical skills circuits of internal medicine students at the Faculty of Medicine, University of Granada (Spain) during the COVID-19 pandemic." <i>Med Educ Online</i> <b>27</b> (1): 2040191. | Wrong Concept       | Was a combination of classroom work and clinical skill circuits (equivalent to OSCE style set up)                                                                       |
| Castro, M. R. H., et al. (2021). "Lessons From Learners: Adapting Medical Student Education During and Post COVID-19." <i>Academic medicine : journal of the Association of American Medical Colleges</i> <b>96</b> (12): 1671-1679.                                              | Wrong Concept       | The placements weren't simulations, but real patient contact facilitated over telemedicine                                                                              |
| Chircop, A. and S. Cobbett (2020). "Gett'n on the bus: evaluation of Sentinel City <sup>®</sup> 3.0 virtual simulation in community/population health clinical placement." <i>International Journal of Nursing Education Scholarship</i> <b>17</b> (1).                           | Wrong Concept       | The agency/neighbourhood component of the placement was replaced with VSim, but all subjects continued the concurrent parts of their training                           |
| Ctri (2021). "Clinical virtual simulation is effective in nursing education." <a href="https://trialsearch.who.int/Trial2.aspx?TrialID=CTRI/2021/01/030826">https://trialsearch.who.int/Trial2.aspx?TrialID=CTRI/2021/01/030826</a> .                                             | Wrong Research Type | This is a protocol for a future study                                                                                                                                   |

| Reference                                                                                                                                                                                                                                                                      | Reason        | Comments                                                                                                                                                                               |
|--------------------------------------------------------------------------------------------------------------------------------------------------------------------------------------------------------------------------------------------------------------------------------|---------------|----------------------------------------------------------------------------------------------------------------------------------------------------------------------------------------|
| DePietro, D. M., et al. (2021). "Medical Student Education During the COVID-19 Pandemic: Initial Experiences Implementing a Virtual Interventional Radiology Elective Course." <i>Academic Radiology</i> 28(1): 128-135.                                                       | Wrong Concept | Discussions were based on real - rather than simulated patients                                                                                                                        |
| Elsayes, K. M., et al. (2021). "Multidisciplinary Approach in Teaching Diagnostic Radiology to Medical Students: The Development, Implementation, and Evaluation of a Virtual Educational Model." <i>Journal of the American College of Radiology : JACR</i> 18(8): 1179-1187. | Wrong Context | Wasn't a placement - it was a series of 10 case based, 1 hr lectures                                                                                                                   |
| Feeley, A., et al. (2021). "Bedside teaching from a distance; surgical education in the COVID era." <i>British journal of surgery</i> 108: vi231-.                                                                                                                             | Wrong Concept | Not a simulation - remote interaction with the hospital patients was facilitated through smart glasses                                                                                 |
| Feeley, A., et al. (2022). "Student Acceptance of Virtual Bedside Surgical Tutorials During COVID-19; A Randomized Control Trial." <i>Journal of Surgical Research</i> 270: 261-265.                                                                                           | Wrong Concept | Not a simulation - remote interaction with the hospital patients was facilitated through smart glasses - appears to be the same study as the conference proceedings by the same author |
| Foohy, S., et al. (2022). "Developing the Virtual Resus Room: Fidelity, Usability, Acceptability, and Applicability of a Virtual Simulation for Teaching and Learning." <i>Academic medicine : journal of the Association of American Medical Colleges</i> 97(5): 679-683.     | Wrong Context | The focus was on the VRR and there was mention of the 2 simulation cases being integrated into a VSP but no detail on it                                                               |
| Goldenson, R. P., et al. (2022). "The Virtual Homeroom: Utility and Benefits of Small Group Online Learning in the COVID-19 Era." <i>Current problems in diagnostic radiology</i> 51(2): 152-154.                                                                              | Wrong Concept | This is the same study as Durfee (included) - but the focus was on the homerooms within the clerkship                                                                                  |
| Grady, Z. J., et al. (2022). "From the Operating Room to Online: Medical Student Surgery Education in the Time of COVID-19." <i>The Journal of surgical research</i> 270: 145-150.                                                                                             | Wrong Context | A 2 week non-clinical elective to prepare and generate interest in surgical placements                                                                                                 |
| Guerandel, A., et al. (2021). "An approach to teaching psychiatry to medical students in the time of Covid-19." <i>Ir J Psychol Med</i> 38(4): 293-299.                                                                                                                        | Wrong Concept | The online module replaces 2 of the 6 weeks of the placement                                                                                                                           |
| Gummerson, C. E., et al. (2021). "Broadening learning communities during COVID-19: developing a curricular framework for telemedicine education in neurology." <i>BMC medical education</i> 21(1): 549.                                                                        | Wrong Concept | The virtual rounds were based on real rather than simulated patients, with the opportunity to read their notes and/or have a telemedicine interview before the lessons                 |

| Reference                                                                                                                                                                                                                                                              | Reason              | Comments                                                                                                                                                              |
|------------------------------------------------------------------------------------------------------------------------------------------------------------------------------------------------------------------------------------------------------------------------|---------------------|-----------------------------------------------------------------------------------------------------------------------------------------------------------------------|
| He, Z. and C. Xiong (2021). Design and Application of Rehabilitation Psychology Practical Teaching System Based on VR Technology.                                                                                                                                      | Wrong Context       | Replaced a traditional mode without practical operation due to lack of resources to rehab disabled patients - so this was a university module rather than a placement |
| Hwang, G.-J., et al. (2022). "The effectiveness of the virtual patient-based social learning approach in undergraduate nursing education: A quasi-experimental study." Nurse education today 108: 105164.                                                              | Wrong Context       | Examined the use of Virtual patients in a social learning framework and compared it to traditional teaching for 1 week - not a placement                              |
| Killam, L. A. and M. Luctkar-Flude (2021). "Virtual Simulations to Replace Clinical Hours in a Family Assessment Course: Development Using H5P, Gamification, and Student Co-Creation." Clinical Simulation in Nursing 57: 59-65.                                      | Wrong Concept       | In person component                                                                                                                                                   |
| Kullberg, M. L., et al. (2020). "E-learning to improve suicide prevention practice skills among undergraduate psychology students: Randomized controlled trial." JMIR Mental Health 7(1).                                                                              | Wrong Context       | e-learning module on suicidal behaviour - Not a placement                                                                                                             |
| Lakhtakia R. Virtual Microscopy in Undergraduate Pathology Education: An early transformative experience in clinical reasoning. Sultan Qaboos Univ Med J. 2021 Aug;21(3):428-435. doi: 10.18295/squmj.4.2021.009. Epub 2021 Aug 29. PMID: 34522409; PMCID: PMC8407892. | Wrong Concept       | conducted as a hybrid placement (computer lab)                                                                                                                        |
| Larraga-García, B., et al. (2021). "Design and Development of an Interactive Web-Based Simulator for Trauma Training: A Pilot Study." Journal of Medical Systems 45(11): 96.                                                                                           | Wrong Context       | Single case virtual simulation                                                                                                                                        |
| Margolin, E. J., et al. (2021). "Reimagining the Away Rotation: A 4-Week Virtual Subinternship in Urology." Journal of surgical education 78(5): 1563-1573.                                                                                                            | Wrong Concept       | includes a teleconferenced clinic with real patients, so not a simulation                                                                                             |
| Middeke, A., et al. (2020). "Transfer of Clinical Reasoning Trained With a Serious Game to Comparable Clinical Problems: a Prospective Randomized Study." Simulation in healthcare 15(2): 75-81.                                                                       | Wrong Context       | The emphasis was on whether clinical reasoning skills learned through the game could be applied in subsequent patient cases - not a placement                         |
| Mikhail, D., et al. (2021). "Changing the Status Quo: Developing a Virtual Sub-Internship in the Era of COVID-19." Journal of surgical education 78(5): 1544-1555.                                                                                                     | Wrong Context       | Not a placement, but a guidebook                                                                                                                                      |
| Miller, A. and K. Guest (2021). "Rising to the Challenge: The Delivery of Simulation and Clinical Skills during COVID-19." Comprehensive child and adolescent nursing 44(1): 6-14.                                                                                     | Wrong Research Type | Discussion paper                                                                                                                                                      |

| Reference                                                                                                                                                                                                                                                                                                                                                                   | Reason              | Comments                                                                              |
|-----------------------------------------------------------------------------------------------------------------------------------------------------------------------------------------------------------------------------------------------------------------------------------------------------------------------------------------------------------------------------|---------------------|---------------------------------------------------------------------------------------|
| Pal, A. D., et al. (2022). "Virtual Simulation for Advanced Practice Registered Nurse Students: Adapting to Shortage of Clinicals." <i>Journal for Nurse Practitioners</i> 18(5): 563-568.                                                                                                                                                                                  | Wrong Context       | Virtual simulations credited 8 FTF placement hours                                    |
| Ramjan, F., et al. (2021). "Psychiatry through a Screen: Adapting Training for a New Reality?" <i>Psychiatria Danubina</i> 33: 18-21.                                                                                                                                                                                                                                       | Wrong Research Type | Commentary summarising curricular changes and student experiences but no specific VSP |
| Ray, J., et al. (2021). "Virtual Telesimulation for Medical Students During the COVID-19 Pandemic" <i>Academic medicine : journal of the Association of American Medical Colleges</i> 96(10) 1431-1435                                                                                                                                                                      | Wrong Concept       | Telecast activities from an in-person simulation - so not computer generated          |
| Roberts, M. L. and J. O. E. Mazurak (2022). "Virtual Clinical Experiences in Nursing Education: Applying a Technology-Enhanced Storyboard Technique to Facilitate Contextual Learning in Remote Environments." <i>Nursing education perspectives</i> 43(4): 260-261.                                                                                                        | Wrong Research Type | Storyboard technique for design detailed rather than a specific placement             |
| Rosenthal, H. B., et al. (2021). "A Near-Peer Educational Model for Online, Interactive Learning in Emergency Medicine." <i>Western Journal of Emergency Medicine: Integrating Emergency Care with Population Health</i> 22(1): 130-135.                                                                                                                                    | Wrong Context       | Lecture series                                                                        |
| Roskvist, R., et al. (2020). "Provision of e-learning programmes to replace undergraduate medical students' clinical general practice attachments during COVID-19 stand-down." <i>Education for primary care : an official publication of the Association of Course Organisers, National Association of GP Tutors, World Organisation of Family Doctors</i> 31(4): 247-254. | Wrong Research Type | General overview of their model - not empirical                                       |
| Rydel, T. A., et al. (2021). "Hands Off Yet All In: A Virtual Clerkship Pilot in the Ambulatory Setting During the COVID-19 Pandemic." <i>Academic medicine : journal of the Association of American Medical Colleges</i> 96(12): 1702-1705.                                                                                                                                | Wrong Concept       | Live rather than simulated telehealth sessions in the placement                       |
| Safdieh, J. E., et al. (2021). "Curricular response to COVID-19: real-time interactive telehealth experience (RITE) program." <i>Medical education online</i> 26(1): 1918609.                                                                                                                                                                                               | Wrong Concept       | Live telehealth rather than simulated patients                                        |
| Salem, J., et al. (2020). "Virtual Patient Journey: a novel learning resource." <i>The clinical teacher</i> 17(3): 315-319.                                                                                                                                                                                                                                                 | Wrong Context       | 3 x 8 min videos of an asthma patient's journey - not a placement                     |

| Reference                                                                                                                                                                                                                                                                     | Reason              | Comments                                                                                               |
|-------------------------------------------------------------------------------------------------------------------------------------------------------------------------------------------------------------------------------------------------------------------------------|---------------------|--------------------------------------------------------------------------------------------------------|
| Santo, L. D., et al. (2022). "The emotional side of the e-learning among nursing students: The role of the affective correlates on e-learning satisfaction." <i>Nurse Educ Today</i> 110: 105268.                                                                             | Wrong Research Type | Survey examining emotions and the cognitive and social dimensions of e-learning                        |
| Seymour-Walsh, A. E., et al. (2020). "Practical approaches to pedagogically rich online tutorials in health professions education." <i>Rural Remote Health</i> 20(2): 6045.                                                                                                   | Wrong Research Type | Guidelines regarding designing online tutorials with sound pedagogical underpinnings                   |
| Shoemaker, M. M., et al. (2021). "Novel application of telemedicine and an alternate EHR environment for virtual clinical education: A new model for primary care education during the SARS-CoV-2 pandemic." <i>International Journal of Medical Informatics</i> 153: 104526. | Wrong Concept       | Live telehealth rather than simulated patients                                                         |
| Smith, N., et al. (2021). "A mixed methods evaluation of the Paediatric Musculoskeletal Matters (PMM) online portfolio." <i>Pediatr Rheumatol Online J</i> 19(1): 85.                                                                                                         | Wrong Context       | e-learning analytics and a survey evaluation of online modules / app for paed MSK Ax - not a placement |
| Spear, L. G., et al. (2022). "Rethinking Clinical Trial Radiology Workflows and Student Training: Integrated Virtual Student Shadowing Experience, Education, and Evaluation." <i>Journal of digital imaging</i> 35(3): 723-731.                                              | Wrong Context       | Online resource to improve image measurement and reporting - not a placement                           |
| Srinivasan, S. L. and O. Burton (2021). "Is It Possible to Replicate a Surgical Placement for Medical Undergraduates Virtually in Response to the COVID-19 Pandemic?" <i>Journal of the American College of Surgeons</i> 233(5): e170-.                                       | Wrong Research Type | Only an abstract - Contacted the author (via Researchgate) to retrieve the full study but no reply     |
| Streitlein-Böhme, I., et al. (2021). "We can also do online - evaluation of the accompanying digital seminar of the elective subject "General Practice" during intership (PJ) at Ruhr-University Bochum." <i>GMS J Med Educ</i> 38(4): Doc73.                                 | Wrong Concept       | The online seminars were part of the placement - a FTF clinical had taken place prior                  |
| Svoboda, S. A., et al. (2021). "Inspired by COVID-19 isolation: Evolving educational techniques in dermatology residency programs." <i>Clinics in dermatology</i> 39(1): 41-44.                                                                                               | Wrong Research Type | Commentary regards telemedicine in dermatology clinical education                                      |
| Teichgräber, U., et al. (2021). "Virtual inverted classroom to replace in-person radiology lectures at the time of the COVID-19 pandemic - a prospective evaluation and historic comparison." <i>BMC medical education</i> 21(1): 611.                                        | Wrong Context       | Physical converted to a virtual flipped classroom - not a placement                                    |

| Reference                                                                                                                                                                                                                                                                                                                  | Reason        | Comments                                                                                                                                                                  |
|----------------------------------------------------------------------------------------------------------------------------------------------------------------------------------------------------------------------------------------------------------------------------------------------------------------------------|---------------|---------------------------------------------------------------------------------------------------------------------------------------------------------------------------|
| Tinoco, J. D. S., et al. (2021). "Effect of educational intervention on clinical reasoning skills in nursing: A quasi-experimental study." <i>Nurse education today</i> 105: 105027-.                                                                                                                                      | Wrong Concept | Assessed an app for developing clinical reasoning skills - not a placement and also mentions a face-face stage                                                            |
| Twogood, R., et al. (2020). "Rapid implementation and improvement of a virtual student placement model in response to the COVID-19 pandemic." <i>BMJ open quality</i> 9(4).                                                                                                                                                | Wrong Concept | Live telehealth rather than simulated patients                                                                                                                            |
| Urbanovi, E., et al. (2022). "Virtual patients: an option for future distance midwifery education?" <i>International Journal of Nursing Education Scholarship</i> 19(1).                                                                                                                                                  | Wrong Context | Detailed the design of a set of virtual patients but it was not conducted as a placement                                                                                  |
| Vielsmeier, V., et al. (2020). "Digital teaching with interactive case presentations of ENT diseases - discussion of utilisation and motivation of students." <i>GMS J Med Educ</i> 37(7): Doc100.                                                                                                                         | Wrong Concept | Has the option of an in-person component                                                                                                                                  |
| Wade, S. W. T., et al. (2020). "Adaptive tutorials versus web-based resources in radiology: a mixed methods analysis in junior doctors of efficacy and engagement." <i>BMC medical education</i> 20(1): 303.                                                                                                               | Wrong Context | Compared adaptive tutorials to web based learning in graduate doctors - not a placement                                                                                   |
| Walsh, H., et al. (2022). "Innovative Hospital-Based Pediatric Virtual Learning for Nursing Students." <i>Nurse Educator</i> 47(2): E30-E33.                                                                                                                                                                               | Wrong Context | Not a placement - but some participants were able to credit 1-2 hours in place of FTF                                                                                     |
| Wands, L., et al. (2020). "Positive Outcomes of Rapid Freeware Implementation to Replace Baccalaureate Student Clinical Experiences." <i>The Journal of nursing education</i> 59(12): 701-704.                                                                                                                             | Wrong Concept | One resource used was augmented reality but the rest were virtual                                                                                                         |
| Wang, M., et al. (2022). "Intelligent virtual case learning system based on real medical records and natural language processing." <i>BMC Med Inform Decis Mak</i> 22(1): 60.                                                                                                                                              | Wrong Context | Documents the process of combining AI natural language processing and electronic notes - intended for an adjunct to clinical learning rather than a stand-alone placement |
| Wagh, S., Devin, J., Lam, A.KY. et al. E-learning and the virtual transformation of histopathology teaching during COVID-19: its impact on student learning experience and outcome. <i>BMC Med Educ</i> 22, 22 (2022). <a href="https://doi.org/10.1186/s12909-021-03066-z">https://doi.org/10.1186/s12909-021-03066-z</a> | Wrong Context | The intervention is replacing a classroom lesson (lectures & seminars). No mention of placement                                                                           |
| Weber, A. M., et al. (2021). "An outpatient telehealth elective for displaced clinical learners during the COVID-19 pandemic." <i>BMC medical education</i> 21(1): 174.                                                                                                                                                    | Wrong Concept | Live telehealth rather than simulated patients                                                                                                                            |

| Reference                                                                                                                                                                                                                       | Reason        | Comments                                                                                     |
|---------------------------------------------------------------------------------------------------------------------------------------------------------------------------------------------------------------------------------|---------------|----------------------------------------------------------------------------------------------|
| Weiss, M. E., et al. (2021). "Effectiveness of using a simulation combined with online learning approach to develop discharge teaching skills." <u>Nurse education in practice</u> <b>52</b> : 103024.                          | Wrong Concept | Intervention was focused on improving discharge planning - not a placement                   |
| Wendt, S., et al. (2021). "A virtual COVID-19 ophthalmology rotation." <u>Survey of ophthalmology</u> <b>66</b> (2): 354-361.                                                                                                   | Wrong Concept | Included in person or video conferenced real patients                                        |
| Wiese, L. K., et al. (2021). "Responding to a simulated disaster in the virtual or live classroom: Is there a difference in BSN student learning?" <u>Nurse education in practice</u> <b>55</b> : 103170.                       | Wrong Context | Single emergency disaster simulation - comparing live and virtual versions - not a placement |
| Williams, J., et al. (2022). "Development of a simulation placement in a pre-registration nursing programme." <u>British journal of nursing (Mark Allen Publishing)</u> <b>31</b> (10): 549-554.                                | Wrong Context | Blended                                                                                      |
| Winship, J. M., et al. (2020). "A case study in rapid adaptation of interprofessional education and remote visits during COVID-19." <u>Journal of Interprofessional Care</u> <b>34</b> (5): 702-705.                            | Wrong Concept | Live patient contact via telecoms rather than simulated patients                             |
| Wittenberg, E., et al. (2021). "COVID 19-transformed nursing education and communication competency: Testing COMFORT educational resources." <u>Nurse education today</u> <b>107</b> : 105105.                                  | Wrong Context | Educational model to support COVID-19 related communication skills - not a placement         |
| Wu, Y., et al. (2021). "Flipping the Passive Radiology Elective by Including Active Learning." <u>Canadian Association of Radiologists journal = Journal l'Association canadienne des radiologistes</u> <b>72</b> (4): 621-627. | Wrong Concept | Not virtual                                                                                  |
| Yan, H., et al. (2021). <u>Research on Real-time Medical Online Learning Content Recommendation based on Multi-view Data Mining.</u>                                                                                            | Wrong Concept | Data mining and analysis across MOOC platforms - not relevant                                |



## Updated Search

### Database Records Breakdown

| Databases              | Results |
|------------------------|---------|
| AMED                   | 0       |
| BioMed Central         | 1       |
| CINAHL                 | 63      |
| Cochrane               | 77      |
| ERIC                   | 3       |
| EthOS                  | 1       |
| Google Scholar         | 88      |
| IEEE Xplore            | 199     |
| MEDLINE                | 394     |
| ProQuest Dissertations | 3       |
| PsychINFO              | 7       |
| PubMed                 | 279     |
| Science Direct         | 8       |
| Scopus                 | 0       |
| Total                  | 1123    |

# PRISMA Chart for Updated Search

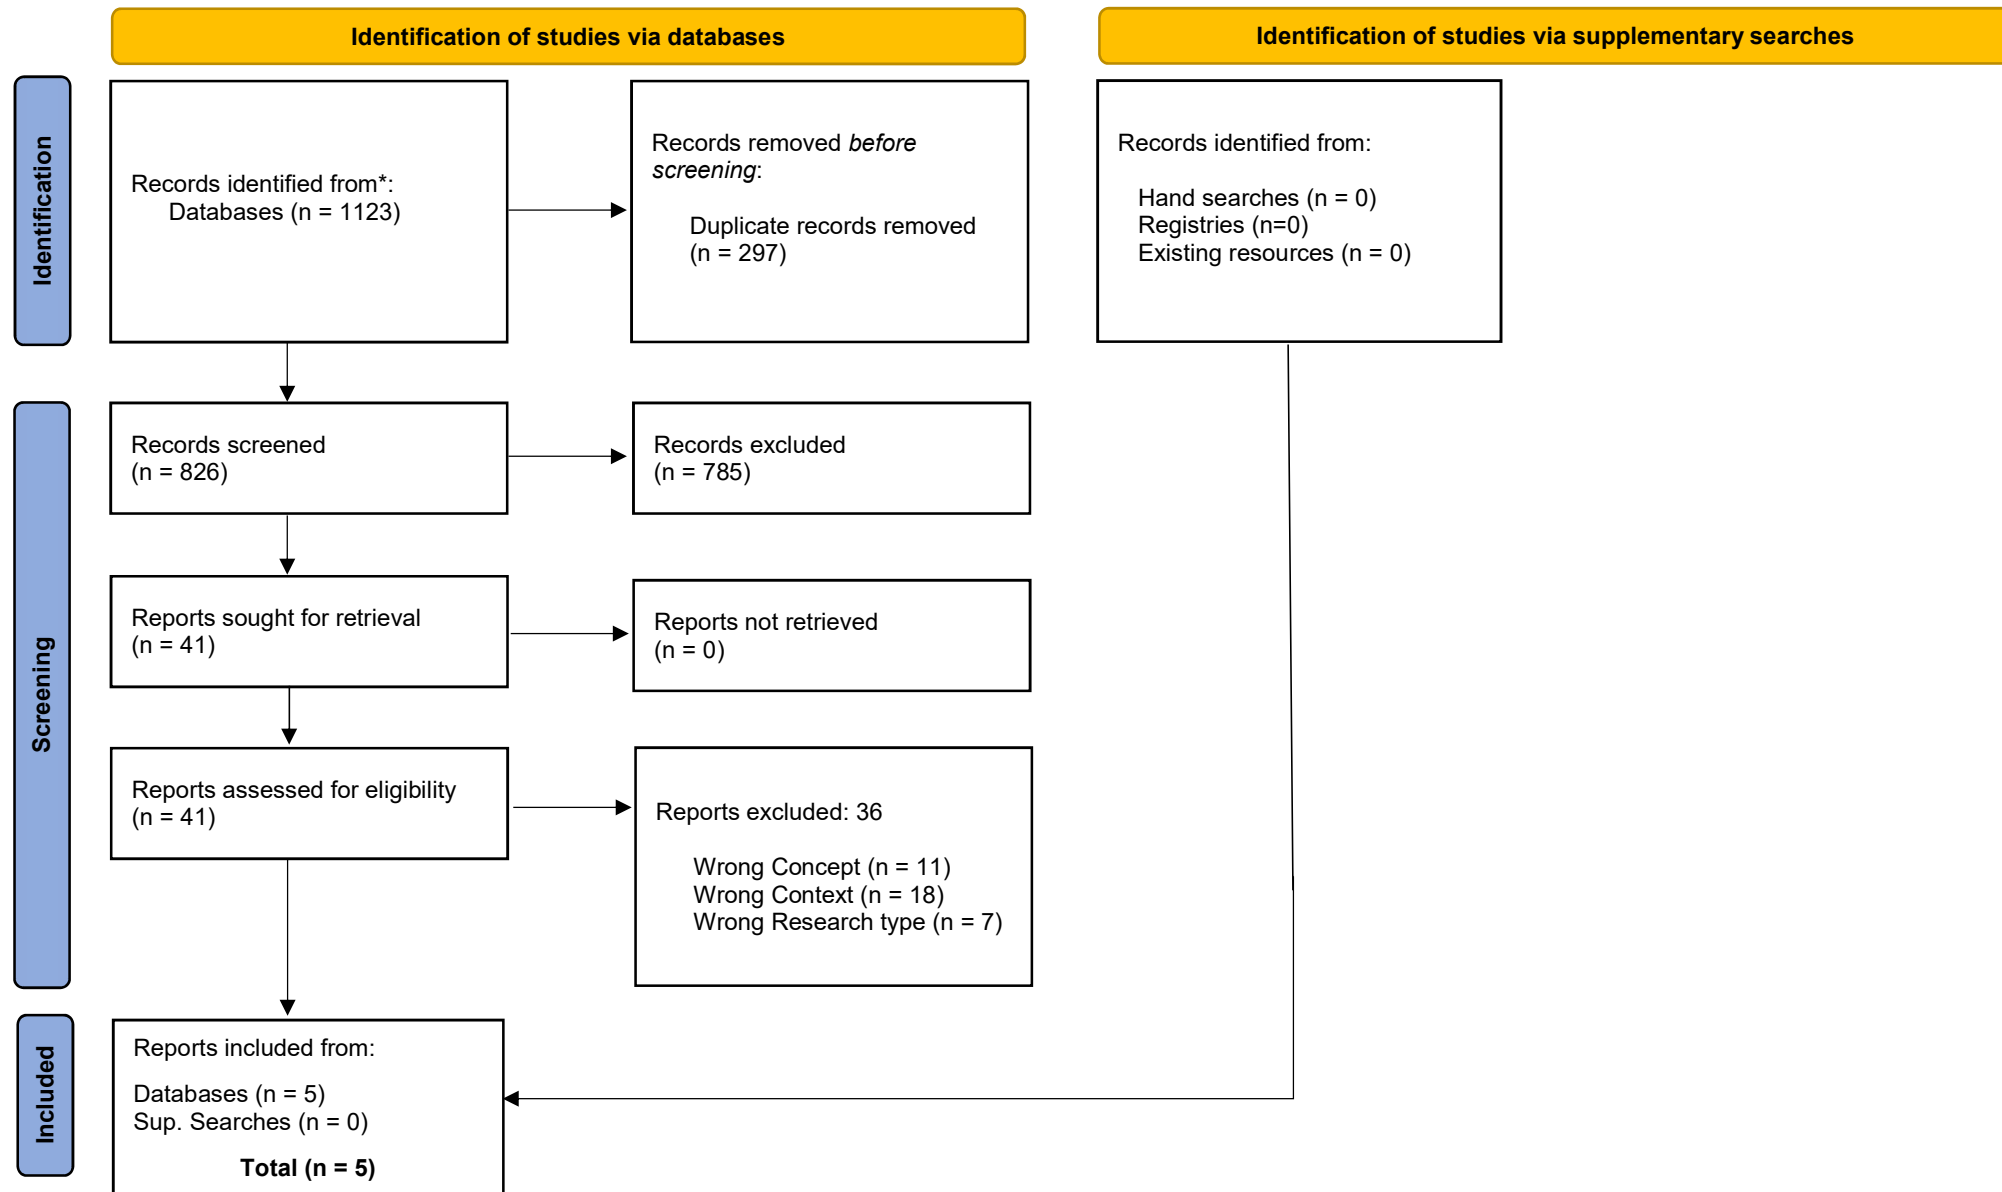

## Database search papers screened out at full text stage, with reasons for exclusion

| Reference                                                                                                                                                                                                                                                                                                       | Reason           | Comment                                                  |
|-----------------------------------------------------------------------------------------------------------------------------------------------------------------------------------------------------------------------------------------------------------------------------------------------------------------|------------------|----------------------------------------------------------|
| Aubrey, C., et al. (2022). "Using simulated placements to promote inclusive practices: a higher education institution faculty's experience of delivery."                                                                                                                                                        | wrong study type | Selected abstracts                                       |
| Chan, P. P., et al. (2023). "Flipped Classroom Case Learning vs Traditional Lecture-Based Learning in Medical School Ophthalmology Education: a Randomized Trial." <i>Academic medicine</i> .                                                                                                                   | wrong concept    | There is a component of FTF / classroom work             |
| Cieslowski, B., et al. (2023). "The Development and Pilot Testing of Immersive Virtual Reality Simulation Training for Prelicensure Nursing Students: A Quasi-Experimental Study." <i>Clinical Simulation in Nursing</i> 77: 6-12.                                                                              | wrong concept    | IVR group also participated in clinical cases, so hybrid |
| Duffy B, Tully R, Stanton AV. An online case-based teaching and assessment program on clinical history-taking skills and reasoning using simulated patients in response to the COVID-19 pandemic. <i>BMC Med Educ</i> . 2023 Jan 4;23(1):4. doi: 10.1186/s12909-022-03950-2. PMID: 36600232; PMCID: PMC9811710. | wrong concept    | Use of telecast simulated patients                       |
| Elnaga, H. H. A., et al. (2023). "Virtual versus paper-based PBL in a pulmonology course for medical undergraduates." <i>BMC medical education</i> 23(1): 433.                                                                                                                                                  | wrong context    | 2 clinical cases in one module - not a placement         |
| Hardin, L. M., et al. (2022). "Innovative Team Approach for Achieving DNP Program Competencies for Distance Learners During the COVID-19 Pandemic." <i>Nursing education perspectives</i> 43(5): 318-320.                                                                                                       | wrong study type | Report without any measurement of student outcomes       |
| Henze, S. M., et al. (2022). "Digital adaptation of teaching disaster and deployment medicine under COVID-19 conditions: a comparative evaluation over 5 years." <i>BMC medical education</i> 22(1): 717.                                                                                                       | wrong context    | A course rather than a placement                         |
| Herrmann-Werner, A., et al. (2022). "Where there are challenges, there are opportunities: An undergraduate medical students' teaching concept for mental health in times of COVID-19." <i>PloS one</i> 17(11): e0277525.                                                                                        | wrong context    | Teaching course converted online: Not a placement        |

| Reference                                                                                                                                                                                                                                                                                                                            | Reason           | Comment                                                                                                       |
|--------------------------------------------------------------------------------------------------------------------------------------------------------------------------------------------------------------------------------------------------------------------------------------------------------------------------------------|------------------|---------------------------------------------------------------------------------------------------------------|
| Ijaz, A., et al. (2023). "Online learning: an effective option for teaching ENT to medical students?" <i>The Journal of laryngology and otology</i> 137(5): 560-564.                                                                                                                                                                 | wrong context    | Not a placement                                                                                               |
| Khanittanuphong, P., et al. (2022). "The impact of the transition from flipped classroom to online lectures on learning outcomes and student satisfaction in a rehabilitation medicine clerkship during the COVID-19 pandemic." <i>BMC medical education</i> 22(1): 885.                                                             | wrong context    | Comparing the flipped classroom component of a clerkship and it's switch to online lectures - not a placement |
| Kumar, P. R., et al. (2022). "F1-taught orthopaedic teaching programme for students (FOTS)." <i>Postgraduate Medical Journal</i> 98(1163): 710-717.                                                                                                                                                                                  | wrong context    | 6 x 60 min weekly joint assessment session - not a placement                                                  |
| Liaw, S. Y., et al. (2023). "Effectiveness of an online program using telesimulation for academic-clinical collaboration in preparing nurse preceptors' roles." <i>Journal of Clinical Nursing (John Wiley &amp; Sons, Inc.)</i> 32(7): 1115-1124.                                                                                   | wrong concept    | Students role played the simulated telemedicine session in VR over zoom                                       |
| Liu, C., et al. (2023). "Beyond Skin Deep: case-based online modules to teach multidisciplinary care in dermatology among clerkship students." <i>BMC medical education</i> 23(1): 90.                                                                                                                                               | wrong context    | An online pre-clerkship for a FTF clerkship - not a placement                                                 |
| Lubinski, B. and A. Weinstein (2022). "Working together but physically siloed-telehealth and interprofessional education among medicine clerkship students." <i>Journal of general internal medicine</i> 37: S662.                                                                                                                   | wrong study type | Selected abstract                                                                                             |
| McAllister, L. L., et al. (2022). "A descriptive case report of telesupervision and online case-based learning for speech and language therapy students in Vietnam during the COVID-19 pandemic." <i>The South African journal of communication disorders = Die Suid-Afrikaanse tydskrif vir Kommunikasieafwykings</i> 69(2): e1-e6. | wrong concept    | Live patient sessions were broadcast - not computer generated                                                 |
| Mergen, M., et al. (2023). "Immersive training of clinical decision making with AI driven virtual patients - a new VR platform called medical tr.AI.ning." <i>GMS journal for medical education</i> 40(2): Doc18.                                                                                                                    | wrong study type | Research plan                                                                                                 |
| Meyer, E. G., et al. (2023). "The Effectiveness of Online Experiential Learning in a Psychiatry Clerkship." <i>Acad Psychiatry</i> 47(2): 181-186.                                                                                                                                                                                   | wrong concept    | Use of simulated patients over telecoms - not computer generated                                              |

| Reference                                                                                                                                                                                                                                               | Reason           | Comment                                                                               |
|---------------------------------------------------------------------------------------------------------------------------------------------------------------------------------------------------------------------------------------------------------|------------------|---------------------------------------------------------------------------------------|
| O'Connor, M. and L. Rainford (2023). "The impact of 3D virtual reality radiography practice on student performance in clinical practice." Radiography (London, England : 1995) 29(1): 159-164.                                                          | wrong concept    | 7 hours VR practice within a 4 week placement                                         |
| Omlor, A. J., et al. (2022). "Comparison of immersive and non-immersive virtual reality videos as substitute for in-hospital teaching during coronavirus lockdown: a survey with graduate medical students in Germany." Med Educ Online 27(1): 2101417. | wrong context    | Observation replaced - but not a placement                                            |
| Petersen, K., et al. (2023). "Online Virtual Patient Cases vs. Weekly Classroom Lectures in an Internal Medicine Clerkship: Effects on Military Learner Outcomes." Military Medicine 188(5): 914-920.                                                   | wrong context    | The Virtual Patient was a substitute for lectures. Didactic content - Not a Placement |
| Salje, J. and M. Moyo (2023). "Implementation of a virtual student placement to improve the application of theory to practice." British journal of nursing (Mark Allen Publishing) 32(9): 434-441.                                                      | wrong concept    | One day teaching on campus (hybrid)                                                   |
| Schoenherr, D. T., et al. (2022). "Development and evaluation of an online integrative histology module: simple design, low-cost, and improves pathology self-efficacy." Medical education online 27(1): 2011692.                                       | wrong context    | Course rather than a placement                                                        |
| Shen, A. H., et al. (2022). "Designing a Plastic and Reconstructive Surgery Virtual Curriculum: Assessment of Medical Student Knowledge, Surgical Skill, and Community Building." Plastic and reconstructive surgery 150(3): 691-700.                   | wrong study type | Selected abstract                                                                     |
| Shin, H. and D. Rim (2023). "Development and assessment of a curriculum model for virtual simulation in nursing: curriculum development and pilot-evaluation." BMC medical education 23(1): 284.                                                        | wrong context    | Not a placement (yet)                                                                 |
| Shorey, S., et al. (2023). "Evaluation of a Theory-Based Virtual Counseling Application in Nursing Education." Computers, informatics, nursing : CIN 41(6): 385-393.                                                                                    | wrong context    | Not a placement                                                                       |
| Showstark, M., et al. (2023). "Results and lessons learned from a virtual multi-institutional problem-based interprofessional learning approach: The VIPE program." Journal of Interprofessional Care 37(1): 164-167                                    | wrong context    | Not a placement                                                                       |

| Reference                                                                                                                                                                                                                                                    | Reason           | Comment                                                                                            |
|--------------------------------------------------------------------------------------------------------------------------------------------------------------------------------------------------------------------------------------------------------------|------------------|----------------------------------------------------------------------------------------------------|
| Su, J., et al. (2023). "Effects of a virtual simulation-based interprofessional education activity for rehabilitation nursing using shared resources: A quasi-experimental study." <i>Nurse education today</i> 126: 105832.                                 | wrong context    | Not a placement - but an activity                                                                  |
| Thirsk, L. M., et al. (2022). "Effect of online versus in-person clinical experiences on nursing student's competency development: A cross-sectional, quasi-experimental design." <i>Nurse education today</i> 117: 105461.                                  | wrong study type | Focus on the surveys rather than description of the online placement                               |
| Uraiby, H., et al. (2022). "Fostering intrinsic motivation in remote undergraduate histopathology education." <i>Journal of clinical pathology</i> 75(12): 837-843.                                                                                          | wrong concept    | The facilitator acted as a virtual patient on screen - not computer generated / virtual simulation |
| Uzun Aksoy, M., et al. (2023). "The effectiveness of the using scenario and video in distance nursing education during COVID-19 pandemic." <i>Teaching &amp; Learning in Nursing</i> 18(1): 24-29.                                                           | wrong context    | Not a placement                                                                                    |
| Varachotisate, P., et al. (2023). "Student academic performance in non-lecture physiology topics following the abrupt change from traditional on-site teaching to online teaching during COVID-19 pandemic." <i>Medical education online</i> 28(1): 2149292. | wrong context    | Pre-clerkship theory focussed teaching - not a placement                                           |
| Vives, M., et al. (2023). "Teaching Psychotherapy to Psychiatric/Mental Health Nurse Practitioner Students in the Virtual Classroom." <i>Issues in Mental Health Nursing</i> 44(6): 551-561.                                                                 | wrong context    | Skills based course: Not a placement                                                               |
| Vogt, L., et al. (2022). "Telemedicine in medical education: An example of a digital preparatory course for the clinical traineeship - a pre-post comparison." <i>GMS journal for medical education</i> 39(4): Doc46.                                        | wrong concept    | Simulated (standardised) patients are used over telemedicine - not computer generated              |
| Wicks, S. K., et al. (2023). "Anaesthetic National Teaching Programme for Students (ANTPS)." <i>Postgraduate Medical Journal</i> 99(1172): 613-623.                                                                                                          | wrong context    | A course, not a placement                                                                          |
| Wojniusz, S., et al. (2022). "Active digital pedagogies as a substitute for clinical placement during the COVID-19 pandemic: the case of physiotherapy education." <i>BMC medical education</i> 22(1): 843.                                                  | wrong concept    | A FTF history and assessment were included as an activity                                          |
