# Supplementary material for: Virtual Simulated Placements in Healthcare Education: A scoping review
Source: bioRxiv or medRxiv preprint supplement (doi:10.1101/2023.10.12.23296932), 2023-10-12
Supplement: Supplementary file [file media-5.pdf]

Supplementary Material A4: Revised data charting tool (**pilot revisions in bold**)

|                                                                           |                   |         |         |         |
|---------------------------------------------------------------------------|-------------------|---------|---------|---------|
| DATA CHARTING                                                             |                   |         |         |         |
| Author(s)                                                                 |                   |         |         |         |
| Year of publication                                                       |                   |         |         |         |
| Title                                                                     |                   |         |         |         |
| Journal                                                                   |                   |         |         |         |
| Study location                                                            |                   |         |         |         |
| <b>Pandemic response</b>                                                  |                   |         |         |         |
| Study design - <b>comparator / control</b><br><b>or pre-post measures</b> |                   |         |         |         |
| Aims, objectives and research questions                                   |                   |         |         |         |
| Study population(s)                                                       |                   |         |         |         |
| Sample size (total)                                                       |                   |         |         |         |
| Number of groups                                                          |                   | Group 1 | Group 2 | Group 3 |
| Size of each Group                                                        |                   |         |         |         |
| Intervention                                                              | <b>Scenario</b>   |         |         |         |
| Intervention description                                                  | <b>Activities</b> |         |         |         |
| Intervention duration                                                     |                   |         |         |         |
| <b>Intervention delivery</b>                                              | <b>Software</b>   |         |         |         |
| <b>Intervention delivery</b>                                              | <b>Hardware</b>   |         |         |         |
| <b>Stakeholders in the design</b>                                         |                   |         |         |         |
| Any underpinning concepts / theories / <b>standards</b>                   |                   |         |         |         |
| <b>Intended learning outcomes (ILOs) / capabilities</b>                   |                   |         |         |         |
| Methodology                                                               |                   |         |         |         |
| Student focussed outcome measures                                         |                   |         |         |         |
| Student outcomes                                                          |                   |         |         |         |
| Important <del>results</del> <b>conclusions</b>                           |                   |         |         |         |
| Sources of funding / conflicts of interest                                |                   |         |         |         |
