# Supplementary material for: Virtual Simulated Placements in Healthcare Education: A scoping review
Source: bioRxiv or medRxiv preprint supplement (doi:10.1101/2023.10.12.23296932), 2023-10-12
Supplement: Supplementary file [file media-6.pdf]

### Supplementary File A5: Table of included study characteristics

| Citation:                               | Purpose / aim                                                                                                             | Population:                                                                           | Study Design:                                                                                                                               | VSP Design:                                                          | Desired capabilities                                                  | Methodology                | Intervention:                                                                                                                   | Delivery:                                                                                            | Student focussed outcome measures | Key Findings                                                                                                                                                                                                                                                                                                                                                                           | Conclusions/ Implications                                                                                                                                                                                                                                                                     | Funding / Conflicts of interest |
|-----------------------------------------|---------------------------------------------------------------------------------------------------------------------------|---------------------------------------------------------------------------------------|---------------------------------------------------------------------------------------------------------------------------------------------|----------------------------------------------------------------------|-----------------------------------------------------------------------|----------------------------|---------------------------------------------------------------------------------------------------------------------------------|------------------------------------------------------------------------------------------------------|-----------------------------------|----------------------------------------------------------------------------------------------------------------------------------------------------------------------------------------------------------------------------------------------------------------------------------------------------------------------------------------------------------------------------------------|-----------------------------------------------------------------------------------------------------------------------------------------------------------------------------------------------------------------------------------------------------------------------------------------------|---------------------------------|
| Author <sup>1</sup> (year)              |                                                                                                                           | Profession (specialist rotation) <sup>1</sup>                                         | Comparison Groups <sup>1</sup>                                                                                                              | Stakeholders Involved <sup>1</sup>                                   |                                                                       |                            | Scenario(s) <sup>1</sup>                                                                                                        | Software <sup>1</sup>                                                                                |                                   |                                                                                                                                                                                                                                                                                                                                                                                        |                                                                                                                                                                                                                                                                                               |                                 |
| Country <sup>2</sup>                    |                                                                                                                           |                                                                                       |                                                                                                                                             | Pedagogical Framework <sup>2</sup>                                   |                                                                       |                            | Activities <sup>2</sup>                                                                                                         | Hardware <sup>2</sup>                                                                                |                                   |                                                                                                                                                                                                                                                                                                                                                                                        |                                                                                                                                                                                                                                                                                               |                                 |
| Publication <sup>3</sup>                |                                                                                                                           | Sample Size <sup>2</sup>                                                              | Pre / post Measures <sup>2</sup>                                                                                                            |                                                                      |                                                                       |                            | Duration <sup>3</sup>                                                                                                           |                                                                                                      |                                   |                                                                                                                                                                                                                                                                                                                                                                                        |                                                                                                                                                                                                                                                                                               |                                 |
| [1] Alphert et al. (2021) <sup>28</sup> | "To assess perceived student engagement & educational value of a new remote clinical radiology learning environment" p113 | [1] 2 <sup>nd</sup> & 3 <sup>rd</sup> year Medical students (on a Radiology rotation) | [1] Conventional placement comparator group. Completed the in person course (mostly observing) within 6 months prior to the pandemic (n=36) | [1] Not specified                                                    | Describing salient findings of images and working towards a diagnosis | Quantitative questionnaire | [1] Choice of 4 VRO specialties from: abdominal, breast, chest, emergency, musculoskeletal, neuroradiology & paediatric imaging | [1] Webex, broadcasting Picture archiving and communication systems (PACS) workstations              | Student experience:               | 87.2% & 75% response rates in grp 1 (VRO) & 2 (in person).<br><br>Educational value was comparable & interaction ratings were slightly higher in Grp 1: Perceived a more active role = 3.95(0.77), grp 2 =3.41(0.97) p=0.01. Reported less boredom = 1.93(0.47), grp 2 = 2.41(0.8) p=0.007<br><br>Confidence using the PACS was higher in grp 2 = 4.04(0.98), grp 1=2.3(1.16) p=0.0001 | Remote clinical radiology education can achieve a similar experience in fewer contact hours.<br><br>An advantage is the potential to standardise the education and provide a variety of images<br><br>A disadvantage is the lack of a full PACS workstation and socialisation with colleagues | Not Stated                      |
| [2] USA                                 |                                                                                                                           | [2] 83                                                                                | [2] Not mentioned                                                                                                                           | [2] VROs of curated cases<br>Online didactic & small group sessions. |                                                                       |                            | [2] Screen based                                                                                                                | Perceived sense of involvement, technical limitations & educational value of the learning experience |                                   |                                                                                                                                                                                                                                                                                                                                                                                        |                                                                                                                                                                                                                                                                                               |                                 |
| [3] Academic Radiology                  |                                                                                                                           | [2] 83                                                                                | [2] post-test measures compared                                                                                                             | [3] 4 weeks                                                          |                                                                       |                            |                                                                                                                                 |                                                                                                      |                                   |                                                                                                                                                                                                                                                                                                                                                                                        |                                                                                                                                                                                                                                                                                               |                                 |

| Citation:                                                   | Purpose / aim                                                                                                                                                                         | Population:                                                             | Study Design:                    | VSP Design:                                                                                 | Desired capabilities                      | Methodology                                                         | Intervention:                                                                                                                                                                                                      | Delivery:                                                          | Student focussed outcome measures                                | Key Findings                                                                                                                                                                                                                   | Conclusions/ Implications                                                                                                                                                                             | Funding / Conflicts of interest |
|-------------------------------------------------------------|---------------------------------------------------------------------------------------------------------------------------------------------------------------------------------------|-------------------------------------------------------------------------|----------------------------------|---------------------------------------------------------------------------------------------|-------------------------------------------|---------------------------------------------------------------------|--------------------------------------------------------------------------------------------------------------------------------------------------------------------------------------------------------------------|--------------------------------------------------------------------|------------------------------------------------------------------|--------------------------------------------------------------------------------------------------------------------------------------------------------------------------------------------------------------------------------|-------------------------------------------------------------------------------------------------------------------------------------------------------------------------------------------------------|---------------------------------|
| Author (year) <sup>1</sup>                                  |                                                                                                                                                                                       | Profession (specialist rotation) <sup>1</sup>                           | Comparison group <sup>1</sup>    | Stakeholders Involved <sup>1</sup>                                                          |                                           |                                                                     | Scenario(s) <sup>1</sup>                                                                                                                                                                                           | Software <sup>1</sup>                                              |                                                                  |                                                                                                                                                                                                                                |                                                                                                                                                                                                       |                                 |
| Country <sup>2</sup>                                        |                                                                                                                                                                                       |                                                                         |                                  | Pedagogical framework <sup>2</sup>                                                          |                                           |                                                                     | Activities <sup>2</sup>                                                                                                                                                                                            | Hardware <sup>2</sup>                                              |                                                                  |                                                                                                                                                                                                                                |                                                                                                                                                                                                       |                                 |
| Publication <sup>3</sup>                                    |                                                                                                                                                                                       | Sample Size <sup>2</sup>                                                | pre / post measures <sup>2</sup> |                                                                                             |                                           |                                                                     | Duration <sup>3</sup>                                                                                                                                                                                              |                                                                    |                                                                  |                                                                                                                                                                                                                                |                                                                                                                                                                                                       |                                 |
| [1] Bhashyam and Dyer (2020) <sup>29</sup>                  | To create a learning platform to allow PGY-1 residents to develop basic orthopaedic knowledge & skills for emergency care & progress from basic to more advanced surgical procedures. | [1] Post graduate year one medical residents on an orthopaedic rotation | [1] Single group                 | [1] 1 x chief resident<br>1x program director<br>2x program coordinators                    | Cognitive knowledge and skill development | Quantitative questionnaire                                          | [1] Basic skills/hand, sport, trauma & arthroplasty. 11 surgical techniques outlined                                                                                                                               | [1] Zoom                                                           | Student satisfaction                                             | 100% were satisfied with the overall experience, module format, take home kits, helping their knowledge base & skill set. 92% felt it improved preparation for the operating room. Total cost per module per student is \$1745 | Described a successful conversion of an in person placement to a virtual boot camp. This could be modified according to local policy, use with cadavers and VR when the technology becomes affordable | Not stated                      |
| [2] USA                                                     |                                                                                                                                                                                       |                                                                         | [2] Post-test design             |                                                                                             |                                           |                                                                     |                                                                                                                                                                                                                    | A central repository for pre-recorded lectures                     | Cost (total, start-up and recurring)                             |                                                                                                                                                                                                                                |                                                                                                                                                                                                       |                                 |
| [3] Journal of the American Academy of Orthopaedic Surgeons |                                                                                                                                                                                       | [2] 12                                                                  |                                  | [2] Problem based learning was encouraged, given the evidence for benefit to adult learners |                                           |                                                                     | [2] Readings, videos, lectures & case "walk throughs."<br>Videoconference demos & informal feedback on surgical skills                                                                                             | [2] Screen based and use of home practice kits for surgical skills |                                                                  |                                                                                                                                                                                                                                |                                                                                                                                                                                                       |                                 |
|                                                             |                                                                                                                                                                                       |                                                                         |                                  |                                                                                             |                                           |                                                                     | [3] 4 weeks                                                                                                                                                                                                        |                                                                    |                                                                  |                                                                                                                                                                                                                                |                                                                                                                                                                                                       |                                 |
| [1] Creagh et al. (2021) <sup>30</sup>                      | "To meet the academic needs of medical students while providing a safe environment during the pandemic.<br><br>...To improve the residents' ability to teach." p420                   | [1] 3 <sup>rd</sup> year Medical Students (on a radiology rotation)     | [1] Single group                 | [1] Not specified                                                                           | Image interpretation                      | Quantitative methods to compare test scores and student evaluations | [1] Abdominal & spinal imaging. X-ray interpretation<br>Women's health<br>Interventional radiography.                                                                                                              | [1] Aquifer (subscription based services)                          | Student performance assessed with the AMSER (or ACR STARS) exam. | Mean AMSER score was 75% (range 50–96%), matched the national average of 75%, t(40) = -0.14868, p = .88.                                                                                                                       | Student performance was in line with other courses on a national standardised examination.                                                                                                            | Supported by HCA Healthcare     |
| [2] USA                                                     |                                                                                                                                                                                       |                                                                         | [2] Post-test design             | [2] Founded on the principles of andragogy:                                                 | Patient care & safety                     |                                                                     |                                                                                                                                                                                                                    | Zoom                                                               |                                                                  |                                                                                                                                                                                                                                |                                                                                                                                                                                                       | No conflicts of interest        |
| [3] Clinical Imaging                                        |                                                                                                                                                                                       | [2] 41                                                                  |                                  | Giving greater control over students' own education.                                        | Resource utilisation                      |                                                                     | [2] Reading materials, lectures, modules<br>American College of Radiography (ACR) e-learning<br>'Hot seat' sessions<br>OSCE style sessions<br>Conferences / tumour board meetings<br>Grand rounds<br>presentations | Webex                                                              | Evaluations on the content and structure.                        | Positive feedback on the content, structure, engagement & time efficiency                                                                                                                                                      | The approach demonstrates the effectiveness of virtual radiology clerkships as viable alternatives to onsite rotations                                                                                |                                 |
|                                                             |                                                                                                                                                                                       |                                                                         |                                  | Emphasis on problem-centred / experiential learning for relevance                           | Insight into the field                    |                                                                     |                                                                                                                                                                                                                    | [2] Screen based                                                   |                                                                  | Improvement in knowledge, leadership skills, search patterns & presenting findings                                                                                                                                             |                                                                                                                                                                                                       |                                 |
|                                                             |                                                                                                                                                                                       |                                                                         |                                  |                                                                                             | Differential diagnosis                    |                                                                     |                                                                                                                                                                                                                    |                                                                    |                                                                  |                                                                                                                                                                                                                                |                                                                                                                                                                                                       |                                 |
|                                                             |                                                                                                                                                                                       |                                                                         |                                  |                                                                                             | Presentation and teaching skills          |                                                                     |                                                                                                                                                                                                                    |                                                                    |                                                                  |                                                                                                                                                                                                                                |                                                                                                                                                                                                       |                                 |
|                                                             |                                                                                                                                                                                       |                                                                         |                                  |                                                                                             |                                           |                                                                     | [3] 4 weeks                                                                                                                                                                                                        |                                                                    |                                                                  |                                                                                                                                                                                                                                |                                                                                                                                                                                                       |                                 |

| Citation:                                | Purpose / aim                                                                                                                            | Population:                                                             | Study Design:                    | VSP Design:                                      | Desired capabilities                                                                                 | Methodology                                    | Intervention:                                                                                                                                                | Delivery:                                                                                                           | Student focussed outcome measures     | Key Findings                                                                                                                                                                                                                                                                      | Conclusions/ Implications                                                                                                                                                                     | Funding / Conflicts of interest |
|------------------------------------------|------------------------------------------------------------------------------------------------------------------------------------------|-------------------------------------------------------------------------|----------------------------------|--------------------------------------------------|------------------------------------------------------------------------------------------------------|------------------------------------------------|--------------------------------------------------------------------------------------------------------------------------------------------------------------|---------------------------------------------------------------------------------------------------------------------|---------------------------------------|-----------------------------------------------------------------------------------------------------------------------------------------------------------------------------------------------------------------------------------------------------------------------------------|-----------------------------------------------------------------------------------------------------------------------------------------------------------------------------------------------|---------------------------------|
| Author (year) <sup>1</sup>               |                                                                                                                                          | Profession (specialist rotation) <sup>1</sup>                           | Comparison group <sup>1</sup>    | Stakeholders Involved <sup>1</sup>               |                                                                                                      |                                                | Scenario(s) <sup>1</sup>                                                                                                                                     | Software <sup>1</sup>                                                                                               |                                       |                                                                                                                                                                                                                                                                                   |                                                                                                                                                                                               |                                 |
| Country                                  |                                                                                                                                          |                                                                         |                                  | Pedagogical framework <sup>2</sup>               |                                                                                                      |                                                | Activities <sup>2</sup>                                                                                                                                      | Hardware <sup>2</sup>                                                                                               |                                       |                                                                                                                                                                                                                                                                                   |                                                                                                                                                                                               |                                 |
| Publication <sup>3</sup>                 |                                                                                                                                          | Sample Size <sup>2</sup>                                                | pre / post measures <sup>2</sup> |                                                  |                                                                                                      |                                                | Duration <sup>3</sup>                                                                                                                                        |                                                                                                                     |                                       |                                                                                                                                                                                                                                                                                   |                                                                                                                                                                                               |                                 |
| [1] De Ponti et al. (2020) <sup>31</sup> | "To assess medical students' perception on fully online training including simulated clinical scenarios during COVID-19 pandemic." p1    | [1] 6 <sup>th</sup> year Medical students (Medicine & Surgery rotation) | [1] Single group                 | [1] Not specified                                | Clinical history taking,                                                                             | Quantitative questionnaire                     | [1] 21 simulated cases: 7 Cardiovascular & cerebrovascular cases                                                                                             | [1] Body Interact                                                                                                   | Student satisfaction                  | 115 (94%) response rate                                                                                                                                                                                                                                                           | The online training avoided interruption to placements and the majority of participants gave a positive response (although a proportion reported technical difficulties)                      | None                            |
| [2] Italy                                |                                                                                                                                          |                                                                         | [2] Post-test design             | [2] Not mentioned                                | Clinical decision making: ordering physical examination, laboratory /imaging tests and interventions |                                                | 6 Trauma cases<br>2 Pneumonia cases<br>2 Infective disorder in pregnancy<br>2 Gastrointestinal surgery cases<br>1 Nephrological case<br>1 Hypoglycaemia case | Microsoft Teams                                                                                                     | Student feedback questionnaire        | 90% gave a positive evaluation<br>93% appreciated the format<br>77% rated the VR realistic for the initial assessment, the diagnostic activity (94%) & treatment options (81%). 84% considered it useful for future hybrid training. 28% had technical issues with online access. |                                                                                                                                                                                               |                                 |
| [3] BMC Medical Education                |                                                                                                                                          | [2] 122                                                                 |                                  |                                                  |                                                                                                      |                                                |                                                                                                                                                              | [2] Introduction (to the case & software), virtual patient based training, debriefing<br><br>[3] 42 hours (21x 2hr) | [2] Screen based                      |                                                                                                                                                                                                                                                                                   |                                                                                                                                                                                               |                                 |
| [1] Durfee et al. (2020) <sup>32</sup>   | "Describe the design and the logistical challenges involved in structuring a virtual radiology clerkship and assess its efficacy." p1462 | [1] Medical students in a radiology rotation                            | [1] Single group                 | [1] The clerkship directors from three hospitals | Patient and safety centred focus                                                                     | Quantitative student scores and questionnaires | [1] 19 Aquifer modules (no detail of the cases provided)                                                                                                     | [1] Aquifer                                                                                                         | Student performance on the AMSER exam | AMSER scores averaged 85% (64-95%): comparable to the in person course.                                                                                                                                                                                                           | The virtual radiology core clerkship was a successful educational experience for medical students. Students enjoyed the small group homerooms, although personal connections were challenging | None stated                     |
| [2] USA                                  |                                                                                                                                          |                                                                         | [2] Post-test design             | [2] Not mentioned                                | Image utilisation, interpretation and generation of a differential diagnoses                         |                                                | [2] Large group didactic lectures<br>Small group homeroom activities: Topic of the day (flipped classroom) and an unknown case conference (readout session)  | Zoom                                                                                                                | Student feedback                      | 50% response rate: 100% rated the course overall as good/excellent.                                                                                                                                                                                                               |                                                                                                                                                                                               |                                 |
| [3] Academic Radiology                   |                                                                                                                                          | [2] 111                                                                 |                                  |                                                  |                                                                                                      |                                                |                                                                                                                                                              | [2] Screen based                                                                                                    |                                       | Suggested improvements commonly related to the didactic lectures                                                                                                                                                                                                                  |                                                                                                                                                                                               |                                 |

| Citation:                            | Purpose / aim                                                                                                                                                                                                     | Population:                                                | Study Design                                    | VSP Design:                                                                                                                                                                                                                                                                                                                                | Desired capabilities  | Methodology                                                                             | Intervention:                                                                                                                                                                                             | Delivery:                                                                                         | Student focussed outcome measures                                                                                                                                                                                                          | Key Findings                                                                                                                                                                                                                                                                                                                                                                                                       | Conclusions/ Implications                                                                                                                                                                                                                                                                                                                                                                      | Funding / Conflicts of interest |
|--------------------------------------|-------------------------------------------------------------------------------------------------------------------------------------------------------------------------------------------------------------------|------------------------------------------------------------|-------------------------------------------------|--------------------------------------------------------------------------------------------------------------------------------------------------------------------------------------------------------------------------------------------------------------------------------------------------------------------------------------------|-----------------------|-----------------------------------------------------------------------------------------|-----------------------------------------------------------------------------------------------------------------------------------------------------------------------------------------------------------|---------------------------------------------------------------------------------------------------|--------------------------------------------------------------------------------------------------------------------------------------------------------------------------------------------------------------------------------------------|--------------------------------------------------------------------------------------------------------------------------------------------------------------------------------------------------------------------------------------------------------------------------------------------------------------------------------------------------------------------------------------------------------------------|------------------------------------------------------------------------------------------------------------------------------------------------------------------------------------------------------------------------------------------------------------------------------------------------------------------------------------------------------------------------------------------------|---------------------------------|
| Author (year) <sup>1</sup>           |                                                                                                                                                                                                                   | Profession (specialist rotation) <sup>1</sup>              |                                                 | Stakeholders Involved <sup>1</sup>                                                                                                                                                                                                                                                                                                         |                       |                                                                                         | Scenario(s) <sup>1</sup>                                                                                                                                                                                  | Software <sup>1</sup>                                                                             |                                                                                                                                                                                                                                            |                                                                                                                                                                                                                                                                                                                                                                                                                    |                                                                                                                                                                                                                                                                                                                                                                                                |                                 |
| Country <sup>2</sup>                 |                                                                                                                                                                                                                   |                                                            |                                                 | Pedagogical framework <sup>2</sup>                                                                                                                                                                                                                                                                                                         |                       |                                                                                         | Activities <sup>2</sup>                                                                                                                                                                                   | Hardware <sup>2</sup>                                                                             |                                                                                                                                                                                                                                            |                                                                                                                                                                                                                                                                                                                                                                                                                    |                                                                                                                                                                                                                                                                                                                                                                                                |                                 |
| Publication <sup>3</sup>             |                                                                                                                                                                                                                   | Sample Size <sup>2</sup>                                   | pre / post measures <sup>2</sup>                |                                                                                                                                                                                                                                                                                                                                            |                       |                                                                                         | Duration <sup>3</sup>                                                                                                                                                                                     |                                                                                                   |                                                                                                                                                                                                                                            |                                                                                                                                                                                                                                                                                                                                                                                                                    |                                                                                                                                                                                                                                                                                                                                                                                                |                                 |
| [1] Fehl et al. (2022) <sup>33</sup> | To provide students an insight into general practice with its particularities regarding patient clientele, spatial conditions and economic and organisational structure despite the lack of physical presence" p2 | [1] 4 <sup>th</sup> year Medical students (in GP practice) | [1] Conventional clerkship group (n=277)        | [1] Not specified                                                                                                                                                                                                                                                                                                                          | Higher-order thinking | Mixed: Surveys generated quantitative & qualitative data which were analysed separately | [1]SOAP cases: gout, acute vertigo, sore throat, hypertension check-up, acute burning on urination, subacute chest pain, geriatric home visit meds review, vaccination, prolonged cough & acute back pain | [1] Student portal<br>Email<br>Video chat<br>Telephone calls (optional)<br>[2] Screen based Phone | Working enjoyment<br>Learning gain<br>Practical relevance Insight into GP work<br>Usage behaviours (devices & chosen teaching formats).<br><br>Open questions: 'What did they like about the virtual clerkship?' 'What could be improved?' | 51.6% response rate for group 1 & 100% for group 2. Group 1: 87.9% enjoyed it 89.9% learned a lot, 76.8% gained practical insights 90.9% perceived high practical relevance. 65.6% welcomed this format into future clerkships. 89% laptop usage. Clinical cases, videos, visual diagnosis and communication with the GP teachers were valued the most. Students recommended an increase in clinical case content. | Students welcomed the digital clerkship.<br><br>The flexible time management, structure & multifaceted learning content were valued.<br><br>It rated comparably to face to face (FTF) learning overall, but online was considered better for teaching theoretical rather than practical skills<br><br>FTF GP clerkships may benefit from complementing online teaching, in a blended approach. | None                            |
| [2] Germany                          |                                                                                                                                                                                                                   | [2] 192                                                    | [2] Post-test comparison of student evaluations | [2] Principles of 'good online teaching' i.e. clear learning objectives matching the curriculum, synchronous /asynchronous teacher-student interaction, promotion of higher-order thinking & communication skills, encouragement of active & self-directed learning while promoting timely completion of tasks & effective time management | Communication skills  |                                                                                         | [2] 10 SOAP cases partly linked with physical examination videos / materials to learn about general practice. Visual diagnosis from images<br>Live video chats with GP teachers                           |                                                                                                   |                                                                                                                                                                                                                                            |                                                                                                                                                                                                                                                                                                                                                                                                                    |                                                                                                                                                                                                                                                                                                                                                                                                |                                 |
| [3] Medical Education Online         |                                                                                                                                                                                                                   |                                                            |                                                 |                                                                                                                                                                                                                                                                                                                                            |                       |                                                                                         | [3] 2 weeks                                                                                                                                                                                               |                                                                                                   |                                                                                                                                                                                                                                            |                                                                                                                                                                                                                                                                                                                                                                                                                    |                                                                                                                                                                                                                                                                                                                                                                                                |                                 |

| Citation:                             | Purpose / aim                                                                                                                         | Population:                                                                                        | Study Design:                    | VSP Design:                                                                                                                              | Desired capabilities                                                                                                                                     | Methodology                                               | Intervention:                                                                                                                                                                          | Delivery:                                                                                                                                                                  | Student focussed outcome measures                                                                                                                                   | Key Findings                                                                                                                                                                                                                                                                                  | Conclusions/ Implications                                                                                                                                                                                                                                                  | Funding / Conflicts of interest                                         |
|---------------------------------------|---------------------------------------------------------------------------------------------------------------------------------------|----------------------------------------------------------------------------------------------------|----------------------------------|------------------------------------------------------------------------------------------------------------------------------------------|----------------------------------------------------------------------------------------------------------------------------------------------------------|-----------------------------------------------------------|----------------------------------------------------------------------------------------------------------------------------------------------------------------------------------------|----------------------------------------------------------------------------------------------------------------------------------------------------------------------------|---------------------------------------------------------------------------------------------------------------------------------------------------------------------|-----------------------------------------------------------------------------------------------------------------------------------------------------------------------------------------------------------------------------------------------------------------------------------------------|----------------------------------------------------------------------------------------------------------------------------------------------------------------------------------------------------------------------------------------------------------------------------|-------------------------------------------------------------------------|
| Author (year) <sup>1</sup>            |                                                                                                                                       | Profession (specialist rotation) <sup>1</sup>                                                      | Comparison group <sup>1</sup>    | Stakeholders Included <sup>1</sup>                                                                                                       |                                                                                                                                                          |                                                           | Scenario(s) <sup>1</sup>                                                                                                                                                               | Software <sup>1</sup>                                                                                                                                                      |                                                                                                                                                                     |                                                                                                                                                                                                                                                                                               |                                                                                                                                                                                                                                                                            |                                                                         |
| Country <sup>2</sup>                  |                                                                                                                                       |                                                                                                    |                                  | Pedagogical framework <sup>2</sup>                                                                                                       |                                                                                                                                                          |                                                           | Activities <sup>2</sup>                                                                                                                                                                | Hardware <sup>2</sup>                                                                                                                                                      |                                                                                                                                                                     |                                                                                                                                                                                                                                                                                               |                                                                                                                                                                                                                                                                            |                                                                         |
| Publication <sup>3</sup>              |                                                                                                                                       | Sample Size <sup>2</sup>                                                                           | pre / post measures <sup>2</sup> |                                                                                                                                          |                                                                                                                                                          |                                                           | Duration <sup>3</sup>                                                                                                                                                                  |                                                                                                                                                                            |                                                                                                                                                                     |                                                                                                                                                                                                                                                                                               |                                                                                                                                                                                                                                                                            |                                                                         |
| [1] Ganji et al. (2022) <sup>34</sup> | To determine the effect of a virtual gynaecology clinic training programme on the knowledge and clinical skills of midwifery students | [1] Midwifery interns on a Gynaecology rotation                                                    | [1] Single group                 | [1] Research team and midwifery experts (faculty members & senior lecturers). Students were consulted via an educational needs interview | Knowledge<br><br>Clinical skills in Interview & history taking<br><br>Problem evaluation<br><br>Clinical judgement<br><br>Problem assessment/ management | Reports on the quantitative part of a mixed methods study | [1] 27 cases including genital infections, abnormal bleeding, menopause, ovarian cysts & abnormal smears                                                                               | [1] Navid – Learning management system (LMS)<br><br>WhatsApp<br><br>Adobe connect<br><br>[2] Screen based                                                                  | Knowledge<br><br>Skills: Modified Mini- CEX - rated over 4 virtual cases.<br><br>Student satisfaction on a scale of 1-9                                             | Knowledge scores pre & post learning were 10.0 ± 1.74 & 13.80 ± 1.43, p < 0.001.<br><br>Post-training scores improved from satisfactory to excellent for clinical judgment, consultation efficiency & clinical competence. Interview scores increased but remained in the satisfactory range. | Training through virtual clinic promoted the knowledge & clinical skills of midwifery interns.<br><br>A virtual clinic may be used in crisis situations & in combination with teaching under normal circumstances by strengthening the infrastructure & removing barriers. | Financially supported by the university.<br><br>No conflict of interest |
| [2] Iran                              |                                                                                                                                       | [2] 47                                                                                             | [2] Repeated measures design     | [2] ADDIE model: (Analysis Design Development Implementation Evaluation)                                                                 |                                                                                                                                                          |                                                           | [2] Multiple choice Webinars, Videos Cases with questions regarding interview, diagnoses & treatment.                                                                                  |                                                                                                                                                                            |                                                                                                                                                                     |                                                                                                                                                                                                                                                                                               |                                                                                                                                                                                                                                                                            |                                                                         |
| [3] Nurse Education Today             |                                                                                                                                       |                                                                                                    |                                  |                                                                                                                                          |                                                                                                                                                          |                                                           | [3] Not stated but 2 days were allocated for each of the 4 stages of the cases                                                                                                         |                                                                                                                                                                            |                                                                                                                                                                     |                                                                                                                                                                                                                                                                                               |                                                                                                                                                                                                                                                                            |                                                                         |
| [1] Gomez et al (2021) <sup>35</sup>  | To rapidly convert to an in-person diagnostic radiology elective to a remote learning experience.                                     | [1] 2 <sup>nd</sup> , 3 <sup>rd</sup> & 4 <sup>th</sup> year Medical students (Radiology rotation) | [1] Single group                 | [1] Course directors                                                                                                                     | Knowledge<br><br>Skills in identifying normal anatomy and common pathology                                                                               | Mixed data in the survey responses                        | [1] Not specified                                                                                                                                                                      | [1] Pacsbin (image library) Education websites & modules<br>Zoom<br>Nearpod<br>PowerPoint<br>Microsoft & Google forms<br>Microsoft Teams<br>Blackboard<br>[2] Screen based | Learner achievement (via completion of quizzes)<br><br>Final exam (modified to reflect the altered course content)<br><br>Enrolment metrics<br><br>Student feedback | 100% pass rate<br><br>Largely positive feedback & gratitude for the opportunity to continue learning<br><br>Recommended more, small group learning, interactive / reflective content, trainee led teaching & shorter days                                                                     | The current state of technology makes radiology particularly well suited for distance learning, & with the proper tools and approaches, effective remote radiology instruction can be achieved.                                                                            | None mentioned                                                          |
| [2] USA                               |                                                                                                                                       |                                                                                                    | [2] Post-test design             | [2] Not mentioned                                                                                                                        |                                                                                                                                                          |                                                           | [2] Interactive cases. Readouts & Hot seat cases<br>Quizzes & jeopardy<br>Website resources<br>Zoom chats<br>Q&A<br>Narrated PowerPoint student submissions<br>Journal club discussion |                                                                                                                                                                            |                                                                                                                                                                     |                                                                                                                                                                                                                                                                                               |                                                                                                                                                                                                                                                                            |                                                                         |
| [3] Academic Radiology                |                                                                                                                                       | [2] 116                                                                                            |                                  |                                                                                                                                          |                                                                                                                                                          |                                                           | [3] 3 weeks                                                                                                                                                                            |                                                                                                                                                                            |                                                                                                                                                                     |                                                                                                                                                                                                                                                                                               |                                                                                                                                                                                                                                                                            |                                                                         |

| Citation:                                | Purpose / aim                                                                                                      | Population:                                                                      | Study Design:                                       | VSP Design:                                                                                                                 | Desired capabilities                                                                                                         | Methodology                        | Intervention:                                                                                                                                                                                                               | Delivery:                                    | Student focussed outcome measures | Key Findings                                                                                                                                                       | Conclusions/ Implications                                                                                                                           | Funding / Conflicts of interest                                                                                                    |
|------------------------------------------|--------------------------------------------------------------------------------------------------------------------|----------------------------------------------------------------------------------|-----------------------------------------------------|-----------------------------------------------------------------------------------------------------------------------------|------------------------------------------------------------------------------------------------------------------------------|------------------------------------|-----------------------------------------------------------------------------------------------------------------------------------------------------------------------------------------------------------------------------|----------------------------------------------|-----------------------------------|--------------------------------------------------------------------------------------------------------------------------------------------------------------------|-----------------------------------------------------------------------------------------------------------------------------------------------------|------------------------------------------------------------------------------------------------------------------------------------|
| Author (year) <sup>1</sup>               |                                                                                                                    | Profession (specialist rotation) <sup>1</sup>                                    | Comparison group <sup>1</sup>                       | Stakeholders Involved <sup>1</sup>                                                                                          |                                                                                                                              |                                    | Scenario(s) <sup>1</sup>                                                                                                                                                                                                    | Software <sup>1</sup>                        |                                   |                                                                                                                                                                    |                                                                                                                                                     |                                                                                                                                    |
| Country <sup>2</sup>                     |                                                                                                                    |                                                                                  |                                                     | Pedagogical framework <sup>2</sup>                                                                                          |                                                                                                                              |                                    | Activities <sup>2</sup>                                                                                                                                                                                                     | Hardware <sup>2</sup>                        |                                   |                                                                                                                                                                    |                                                                                                                                                     |                                                                                                                                    |
| Publication <sup>3</sup>                 |                                                                                                                    | Sample Size <sup>2</sup>                                                         | pre / post measures <sup>2</sup>                    |                                                                                                                             |                                                                                                                              |                                    | Duration <sup>3</sup>                                                                                                                                                                                                       |                                              |                                   |                                                                                                                                                                    |                                                                                                                                                     |                                                                                                                                    |
| [1] He et al. (2021) <sup>36</sup>       | To examine the effect of an online neurology course & whether it can cater for interns from different programs.    | [1] Medical interns (on a neurology rotation)                                    | [1] Single group                                    | [1] Not specified                                                                                                           | Practical skills (New patient admission, physical exam & medical record writing).                                            | Quantitative                       | [1] Nervous system, Cardiopulmonary resuscitation & Lumbar puncture                                                                                                                                                         | [1] Tencent class (live broadcast platform). | Final exam scores                 | 100% response rate & consistent positive ratings                                                                                                                   | The neurology training course was effective and was highly rated by the interns.                                                                    | Funding from: Central South University. National Natural Science Foundation of China. Huxiang High-Level Talent Gathering Project. |
| [2] China                                |                                                                                                                    |                                                                                  | [2] Post-test design with subgroup analysis by:     | [2] Not mentioned                                                                                                           | Theoretical knowledge                                                                                                        |                                    | [2] Small private online courses (SPOC). Didactic, flipped classroom & case based learning. Videos of ward rounds, typical clinical cases & difficult case discussions. Interactive case discussions /conferences & reading | WeChat group (for shared files)              | Student evaluation                | 99% recommended incorporating the course into future programmes.                                                                                                   |                                                                                                                                                     |                                                                                                                                    |
| [3] Medical education online             | Whether group size has an impact. To analyse how it can be refined.                                                | [2] 92                                                                           | Programme enrolment (3 groups)<br>Intake (6 groups) |                                                                                                                             |                                                                                                                              |                                    | [2] Screen based                                                                                                                                                                                                            | PowerPoint                                   |                                   | No difference in test scores between programs (p < 0.05)                                                                                                           |                                                                                                                                                     | No conflicts of interest                                                                                                           |
|                                          |                                                                                                                    |                                                                                  |                                                     |                                                                                                                             |                                                                                                                              |                                    | [3] 3 weeks                                                                                                                                                                                                                 |                                              |                                   | Students groups < 15 had a better learning experience (p < 0.05)                                                                                                   |                                                                                                                                                     |                                                                                                                                    |
|                                          |                                                                                                                    |                                                                                  |                                                     |                                                                                                                             |                                                                                                                              |                                    |                                                                                                                                                                                                                             |                                              |                                   | Interactive discussions & analysis were rated highest.                                                                                                             |                                                                                                                                                     |                                                                                                                                    |
| [1] Holmberg et al. (2021) <sup>37</sup> | To deliver essential elements of the sub-internship virtually and to address limited teaching faculty availability | [1] 4 <sup>th</sup> year Medical students on an internal medicine sub-internship | [1] Single group                                    | [1] Clerkship directors, course director, recent graduates of the in-person course (4 senior medical students - near peers) | Order-writing Communication<br>Clinical reasoning<br>Using medical literature<br>Admitting a patient, cross overs & handoffs | Mixed data in the survey responses | [1] Not specified                                                                                                                                                                                                           | [1] Zoom                                     | Student experience                | All self-rated competencies demonstrated significant improvement except the describing how to efficiently admit a patient (didn't reach statistical significance). | Our findings and our experiences with the virtual sub-internship suggest that a virtual sub-internship can be a high quality educational experience | None                                                                                                                               |
| [2] USA                                  |                                                                                                                    |                                                                                  | [2] Repeated measures design                        | [2] Not mentioned                                                                                                           |                                                                                                                              |                                    | [2] Orientation & debrief. Student presentations<br>Interactive lectures<br>Small-group discussions<br>Case-based faculty led/peer teaching<br>Role-play<br>Resident report                                                 | [2] Screen based                             | 5 self-rated competencies         | The extent to which the course accomplished its learning objectives                                                                                                |                                                                                                                                                     |                                                                                                                                    |
| [3] Academic Medicine                    |                                                                                                                    | [2] 10                                                                           |                                                     |                                                                                                                             | Independent learning                                                                                                         |                                    | [3] 4 weeks                                                                                                                                                                                                                 |                                              |                                   | Open-ended responses indicated initial skepticism, but the course exceeded expectations.                                                                           |                                                                                                                                                     |                                                                                                                                    |

| Citation:                               | Purpose / aim                                                                                                                                                                                 | Population:                                                                                 | Study Design:                    | VSP Design:                                                  | Desired capabilities                                                                                                                                                                                                           | Methodology | Intervention:                                                                                                                                                                                                  | Delivery:                                                                                                          | Student focussed outcome measures                                           | Key Findings                                                                                                                                                                                                                                                                                   | Conclusions/ Implications                                                                                                                                                                                                    | Funding / Conflicts of interest    |
|-----------------------------------------|-----------------------------------------------------------------------------------------------------------------------------------------------------------------------------------------------|---------------------------------------------------------------------------------------------|----------------------------------|--------------------------------------------------------------|--------------------------------------------------------------------------------------------------------------------------------------------------------------------------------------------------------------------------------|-------------|----------------------------------------------------------------------------------------------------------------------------------------------------------------------------------------------------------------|--------------------------------------------------------------------------------------------------------------------|-----------------------------------------------------------------------------|------------------------------------------------------------------------------------------------------------------------------------------------------------------------------------------------------------------------------------------------------------------------------------------------|------------------------------------------------------------------------------------------------------------------------------------------------------------------------------------------------------------------------------|------------------------------------|
| Author (year) <sup>1</sup>              |                                                                                                                                                                                               | Profession (specialist rotation) <sup>1</sup>                                               | Comparison groups <sup>1</sup>   | Stakeholders Involved <sup>1</sup>                           |                                                                                                                                                                                                                                |             | Scenario(s) <sup>1</sup>                                                                                                                                                                                       | Software <sup>1</sup>                                                                                              |                                                                             |                                                                                                                                                                                                                                                                                                |                                                                                                                                                                                                                              |                                    |
| Country <sup>2</sup>                    |                                                                                                                                                                                               |                                                                                             |                                  | Pedagogical Framework <sup>2</sup>                           |                                                                                                                                                                                                                                |             | Activities <sup>2</sup>                                                                                                                                                                                        | Hardware <sup>2</sup>                                                                                              |                                                                             |                                                                                                                                                                                                                                                                                                |                                                                                                                                                                                                                              |                                    |
| Publication <sup>3</sup>                |                                                                                                                                                                                               | Sample Size <sup>2</sup>                                                                    | pre / post measures <sup>2</sup> |                                                              |                                                                                                                                                                                                                                |             | Duration <sup>3</sup>                                                                                                                                                                                          |                                                                                                                    |                                                                             |                                                                                                                                                                                                                                                                                                |                                                                                                                                                                                                                              |                                    |
| [1] Joung and Kang (2022) <sup>38</sup> | Investigate the potential of VS-based education as an alternative for clinical psychiatric nurse training & consider how it can be optimised as an educational method                         | [1] 4 <sup>th</sup> year Nursing Students (Psychiatry rotation)                             | [1] Single group                 | [1] Not specified                                            | The transfer of intrinsic nursing values such as empathy.                                                                                                                                                                      | Qualitative | [1] Schizophrenia, bipolar disorder, anxiety disorder and depressive disorder                                                                                                                                  | [1] vSim for Nursing Video conferencing software                                                                   | Focus Groups                                                                | 3 key themes:<br>1. Students were glad that the patients were not real people<br>2. vSim serving as a bridge between the text & real world<br>3. Supplementations needed for vSims to replace clinical practice                                                                                | vSim was recognised as a tool linking theory with actual clinical practical training. Students were able to repeat practice to solve problems and work in a safe environment but were unable to have real human experiences. | No funding or conflict of interest |
| [2] South Korea                         |                                                                                                                                                                                               |                                                                                             | [2] Post-test design             | [2] Not mentioned                                            |                                                                                                                                                                                                                                |             | [2] vSim sessions, team conferences with an instructor                                                                                                                                                         | [2] Screen based                                                                                                   |                                                                             |                                                                                                                                                                                                                                                                                                |                                                                                                                                                                                                                              |                                    |
| [3] Issues in Mental Health Nursing     |                                                                                                                                                                                               | [2] 20                                                                                      |                                  |                                                              |                                                                                                                                                                                                                                |             | [3] 90 hours over 10 days                                                                                                                                                                                      |                                                                                                                    |                                                                             |                                                                                                                                                                                                                                                                                                |                                                                                                                                                                                                                              |                                    |
| [1] Kasai et al. (2021) <sup>39</sup>   | To evaluate the feasibility & effectiveness of this approach. To identify the advantages & disadvantages of online-simulated clinical placement (sCP) from the medical students' perspectives | [1] 5 <sup>th</sup> year Medical students on a respiratory unit & general medicine rotation | [1] Single group                 | [1] Not specified                                            | History taking<br>Diagnosis<br>Select tests & interpret results<br>Treatment planning<br>Medical documentation & present the clinical course<br>Perform safe, evidence based treatment<br>Informed consent & patient education | Mixed       | [1] General medicine outpatient cases & respiratory inpatient cases<br><br>[2] Simulated electronic & health records (sEHR) electronic-Practice Based Learning (e-PBL) Online virtual medical interviews (VMI) | [1] Video conference system<br><br>Learning management system (LMS)<br><br>Microsoft excel<br><br>[2] Screen based | Self-evaluation of clinical performance<br><br>Semi structured focus groups | 100% response rate<br><br>Online sCP is an efficient learning method & useful for learning how to write medical records & summaries<br><br>Clinical clerkship was more useful for learning associated with medical interviews, physical examination & humanistic qualities eg. professionalism | Online-sCP with sEHR, e-PBL, and online-VMI could be useful in learning some of the clinical skills acquired through clinical clerkship.                                                                                     | None                               |
| [2] Japan                               |                                                                                                                                                                                               |                                                                                             | [2] Repeated measures design     | [2] Peer assisted learning applied to problem based learning |                                                                                                                                                                                                                                |             |                                                                                                                                                                                                                |                                                                                                                    |                                                                             |                                                                                                                                                                                                                                                                                                |                                                                                                                                                                                                                              |                                    |
| [3] BMC Medical Education               |                                                                                                                                                                                               | [2] 43                                                                                      |                                  |                                                              |                                                                                                                                                                                                                                |             | [3] 4 weeks                                                                                                                                                                                                    |                                                                                                                    |                                                                             |                                                                                                                                                                                                                                                                                                |                                                                                                                                                                                                                              |                                    |

| Citation                              | Purpose / aim                                                                                                                                                 | Population:                                     | Study Design:                    | VSP Design:                                                                     | Desired capabilities                                                               | Methodology                                      | Intervention:                                                                                  | Delivery:                                                    | Student focussed outcome measures                                             | Key Findings                                                                                               | Conclusions/ Implications                                                                                                                                                                                                                                   | Funding / Conflicts of interest                                                         |
|---------------------------------------|---------------------------------------------------------------------------------------------------------------------------------------------------------------|-------------------------------------------------|----------------------------------|---------------------------------------------------------------------------------|------------------------------------------------------------------------------------|--------------------------------------------------|------------------------------------------------------------------------------------------------|--------------------------------------------------------------|-------------------------------------------------------------------------------|------------------------------------------------------------------------------------------------------------|-------------------------------------------------------------------------------------------------------------------------------------------------------------------------------------------------------------------------------------------------------------|-----------------------------------------------------------------------------------------|
| Author (year) <sup>1</sup>            |                                                                                                                                                               | Profession (specialist rotation) <sup>1</sup>   | Comparison group <sup>1</sup>    | Stakeholders Involved <sup>1</sup>                                              |                                                                                    |                                                  | Scenario(s) <sup>1</sup>                                                                       | Software <sup>1</sup>                                        |                                                                               |                                                                                                            |                                                                                                                                                                                                                                                             |                                                                                         |
| Country <sup>2</sup>                  |                                                                                                                                                               |                                                 |                                  | Pedagogical Frameworks <sup>2</sup>                                             |                                                                                    |                                                  | Activities <sup>2</sup>                                                                        | Hardware <sup>2</sup>                                        |                                                                               |                                                                                                            |                                                                                                                                                                                                                                                             |                                                                                         |
| Publication <sup>3</sup>              |                                                                                                                                                               | Sample Size <sup>2</sup>                        | pre / post measures <sup>2</sup> |                                                                                 |                                                                                    |                                                  | Duration <sup>3</sup>                                                                          |                                                              |                                                                               |                                                                                                            |                                                                                                                                                                                                                                                             |                                                                                         |
| [1] Kubin et al. (2021) <sup>40</sup> | To develop an innovative revised plan for facilitation of clinical learning experiences in the virtual learning environment.                                  | [1] Nursing students on a Paediatric Rotation   | [1] Single group                 | [1] Not specified                                                               | Nursing process                                                                    | Mixed: Survey with Likert & open ended questions | [1] Various paediatric disorders. Child with diabetic ketoacidosis was used in the escape room | [1] vSim NurseThink vClinical                                | Student satisfaction.                                                         | 100% response rate                                                                                         | Virtual activities can be as effective as in-person clinical learning methodologies. Integrating virtual activities into clinical curricula can be a viable option, especially in areas where clinical placement is limited                                 | Not stated                                                                              |
| [2] USA                               |                                                                                                                                                               |                                                 | [2] Post-test design             | [2] International                                                               | Growth and development                                                             |                                                  | [2] Virtual escape rooms, unfolding video case studies, & blended prioritisation simulations.  | F.A. Davis' Paediatric Interactive Clinical Scenarios        | Evaluations pf each clinical activity and the ability to meet course outcomes | Self-reported increases in clinical reasoning, prioritisation, communication and critical thinking skills. |                                                                                                                                                                                                                                                             |                                                                                         |
| [3] Journal of Nursing Education      |                                                                                                                                                               | [2] Not stated (taught in small groups of 5-10) |                                  | [2] Simulation and Learning (INACSL) best practice guidelines                   | Assessment                                                                         |                                                  | Clinical judgment & reasoning skills                                                           | Virtual Healthcare Experience                                |                                                                               |                                                                                                            |                                                                                                                                                                                                                                                             |                                                                                         |
|                                       |                                                                                                                                                               |                                                 |                                  |                                                                                 | Prioritisation & delegation                                                        |                                                  | [3] Not stated                                                                                 | Flipgrid                                                     |                                                                               |                                                                                                            |                                                                                                                                                                                                                                                             |                                                                                         |
|                                       |                                                                                                                                                               |                                                 |                                  |                                                                                 | Communication skills.                                                              |                                                  |                                                                                                | Google Forms & Sites                                         |                                                                               |                                                                                                            |                                                                                                                                                                                                                                                             |                                                                                         |
|                                       |                                                                                                                                                               |                                                 |                                  |                                                                                 |                                                                                    |                                                  |                                                                                                | [2] Screen based                                             |                                                                               |                                                                                                            |                                                                                                                                                                                                                                                             |                                                                                         |
| [1] Luo et al. (2021) <sup>41</sup>   | To understand students' performance, learning effectiveness & satisfaction with their participation in distance learning. To compare outcomes between genders | [1] 4 <sup>th</sup> year Nursing students       | [1] Single group                 | [1] Nursing educators from the University                                       | Pass the 2020 Chinese Registered Nurse Licensure Exam                              | Quantitative                                     | [1] Medical, surgical, obstetrics & gynaecology, paediatrics, fundamental nursing              | [1]Videoconferencing platforms (Tencent Meeting & Ding Talk) | Theoretical knowledge                                                         | 100% response rate                                                                                         | Distance learning combining webinars & virtual simulations could meet the learning requirements of senior nursing students in a safe environment in a flexible manner, & students could obtain theoretical knowledge & grow their clinical thinking ability | Funded by Wuhan University Teaching & Research reform Project. No conflicts of interest |
| [2] China                             |                                                                                                                                                               | [2] 35                                          | [2] Repeated measures design     | [2] Outcome-Based Educational theory, which emphasises student centred learning | knowledge and clinical competence requirements specified in the National Standards |                                                  | [2] Webinars (lectures & case based learning) & Virtual simulations                            | vSim                                                         | Clinical thinking ability                                                     | High levels of student engagement, satisfaction & theoretical knowledge.                                   |                                                                                                                                                                                                                                                             |                                                                                         |
| [3] Clinical Simulation in Nursing    |                                                                                                                                                               |                                                 |                                  | National Standards for Nursing Undergraduates                                   |                                                                                    |                                                  |                                                                                                | [2] Screen based                                             | Academic self-efficacy                                                        | Student satisfaction                                                                                       |                                                                                                                                                                                                                                                             |                                                                                         |
|                                       |                                                                                                                                                               |                                                 |                                  |                                                                                 |                                                                                    |                                                  | [3] 3 months                                                                                   |                                                              |                                                                               | Females outperformed males in all domains                                                                  |                                                                                                                                                                                                                                                             |                                                                                         |



| Citation:                                     | Purpose / aim                                                                                                                       | Population:                                           | Study Design:                    | VSP Design:                                                                               | Desired capabilities                                                                                                                         | Methodology | Intervention:                                                                                                                                            | Delivery:                                          | Student focussed outcome measures                               | Key Findings                                                                                                                                                                                                                                                                                                      | Conclusions/ Implications                                                                      | Funding / Conflicts of interest                          |
|-----------------------------------------------|-------------------------------------------------------------------------------------------------------------------------------------|-------------------------------------------------------|----------------------------------|-------------------------------------------------------------------------------------------|----------------------------------------------------------------------------------------------------------------------------------------------|-------------|----------------------------------------------------------------------------------------------------------------------------------------------------------|----------------------------------------------------|-----------------------------------------------------------------|-------------------------------------------------------------------------------------------------------------------------------------------------------------------------------------------------------------------------------------------------------------------------------------------------------------------|------------------------------------------------------------------------------------------------|----------------------------------------------------------|
| Author (year) <sup>1</sup>                    |                                                                                                                                     | Profession (specialist rotation) <sup>1</sup>         | Comparison groups <sup>1</sup>   | Stakeholders Involved <sup>1</sup>                                                        |                                                                                                                                              |             | Scenario(s) <sup>1</sup>                                                                                                                                 | Software <sup>1</sup>                              |                                                                 |                                                                                                                                                                                                                                                                                                                   |                                                                                                |                                                          |
| Country <sup>2</sup>                          |                                                                                                                                     |                                                       |                                  | Pedagogical Framework <sup>2</sup>                                                        |                                                                                                                                              |             | Activities <sup>2</sup>                                                                                                                                  | Hardware <sup>2</sup>                              |                                                                 |                                                                                                                                                                                                                                                                                                                   |                                                                                                |                                                          |
| Publication <sup>3</sup>                      |                                                                                                                                     | Sample Size <sup>2</sup>                              | pre / post measures <sup>2</sup> |                                                                                           |                                                                                                                                              |             | Duration <sup>3</sup>                                                                                                                                    |                                                    |                                                                 |                                                                                                                                                                                                                                                                                                                   |                                                                                                |                                                          |
| [1] Martin-Delgado et al (2022) <sup>42</sup> | To explore final-year nursing experiences from completing their clinical training in a teaching role practicum during the pandemic. | [1] Final year Nursing students                       | [1] Single group                 | [1] Not specified                                                                         | Designing and developing evidence based educational materials aimed at meeting the learning needs of their peers.                            | Qualitative | [1] Covid 19 educational needs, including management of respiratory patients, mechanical ventilation, use of protection equipment                        | [1] Video conferencing software, Moodle (LMS)      | Themes from student reflective journals (18 of the 34 students) | Three themes<br>1. Emotions due to not being able to complete their final placement & not to joining the workforce<br>2. Perceived benefits of a teaching role,<br>3. Recognising the teaching role as key to the profession & the importance of scientific evidence in clinical practice.                        | The online teaching practicum gave students the opportunity to develop education competencies. | No mention of conflicts of interest. No external funding |
| [2] Spain                                     |                                                                                                                                     | [2] 34                                                | [2] Post-test design             | [2] Not stated                                                                            |                                                                                                                                              |             | [2] Online training Mentoring sessions Design and development of educational material                                                                    | [2] Screen based                                   |                                                                 |                                                                                                                                                                                                                                                                                                                   |                                                                                                |                                                          |
| [3] Journal of Professional Nursing           |                                                                                                                                     |                                                       |                                  |                                                                                           |                                                                                                                                              |             | [3] 3 months                                                                                                                                             |                                                    |                                                                 |                                                                                                                                                                                                                                                                                                                   |                                                                                                |                                                          |
| [1] Nguyen et al (2023) <sup>43</sup>         | To transition an introductory anaesthesiology clerkship to an entirely virtual curriculum                                           | [1] 3rd & 4th year Medical students (anaesthesiology) | [1] Single group                 | [1] Not stated, but past student surveys from placements were used for a needs assessment | Nine educational objectives were outlined, including information/ description, differential diagnosis, treatment prioritisation and planning | Mixed       | [1] Preoperative evaluation, inhaled intravenous anaesthetics, airway management, anaphylaxis, malignant hyperthermia and unanticipated difficult airway | [1] Canvas (LMS) PowerPoint Simulation videos Zoom | Survey with Likert and open-text responses                      | 79% response rate. Clerkship met / exceeded expectations in all areas. All students agreed / strongly agreed that the objectives were clear & achieved. Two students indicated that the assessment tools could align better with the curriculum & one wanted more didactics. One noted technical issues with Zoom | A compelling clerkship was executed, which was highly rated.                                   | No disclosures or funding to report                      |
| [2] USA                                       |                                                                                                                                     |                                                       | [2] Post-test design             | [2] Kerns 6 steps of curriculum development                                               |                                                                                                                                              |             | [2] Didactics, assigned readings, case based learning discussions                                                                                        | [2] Screen based                                   |                                                                 |                                                                                                                                                                                                                                                                                                                   |                                                                                                |                                                          |
| [3] MedEdPortal                               |                                                                                                                                     | [2] 28                                                |                                  |                                                                                           |                                                                                                                                              |             | [3] 2 weeks                                                                                                                                              |                                                    |                                                                 |                                                                                                                                                                                                                                                                                                                   |                                                                                                |                                                          |

| Citation                                     | Purpose / aim                                                                                                                                                                  | Population:                                                 | Study Design:                                           | VSP Design:                                                                                                             | Desired capabilities                             | Methodology                                                          | Intervention:                                                            | Delivery:                                                                                                                                              | Student focussed outcome measures                                                   | Key Findings                                                                  | Conclusions/ Implications                                                                                                                                                                               | Funding / Conflicts of interest                                                                                       |                                 |
|----------------------------------------------|--------------------------------------------------------------------------------------------------------------------------------------------------------------------------------|-------------------------------------------------------------|---------------------------------------------------------|-------------------------------------------------------------------------------------------------------------------------|--------------------------------------------------|----------------------------------------------------------------------|--------------------------------------------------------------------------|--------------------------------------------------------------------------------------------------------------------------------------------------------|-------------------------------------------------------------------------------------|-------------------------------------------------------------------------------|---------------------------------------------------------------------------------------------------------------------------------------------------------------------------------------------------------|-----------------------------------------------------------------------------------------------------------------------|---------------------------------|
| Author (year) <sup>1</sup>                   |                                                                                                                                                                                | Profession (specialist rotation) <sup>1</sup>               | Comparison group <sup>1</sup>                           | Stakeholders Involved <sup>1</sup>                                                                                      |                                                  |                                                                      | Scenario(s) <sup>1</sup>                                                 | Software <sup>1</sup>                                                                                                                                  |                                                                                     |                                                                               |                                                                                                                                                                                                         |                                                                                                                       |                                 |
| Country <sup>2</sup>                         |                                                                                                                                                                                |                                                             |                                                         | Pedagogical framework <sup>2</sup>                                                                                      |                                                  |                                                                      | Activities <sup>2</sup>                                                  | Hardware <sup>2</sup>                                                                                                                                  |                                                                                     |                                                                               |                                                                                                                                                                                                         |                                                                                                                       |                                 |
| Publication <sup>3</sup>                     |                                                                                                                                                                                | Sample Size <sup>2</sup>                                    | pre / post measures <sup>2</sup>                        |                                                                                                                         |                                                  |                                                                      | Duration <sup>3</sup>                                                    |                                                                                                                                                        |                                                                                     |                                                                               |                                                                                                                                                                                                         |                                                                                                                       |                                 |
| [1] Rahm et al. (2021) <sup>44</sup>         | To enrich our understanding of how students perceive realistic multimodal game-like e-learning cases within a complete e-learning-based curriculum.                            | [1] Medical students in an internal medicine rotation       | [1] Single group                                        | [1] Medical students (who had already completed the internal medicine module) and physicians from different disciplines | Decision-making skills                           | Mixed: Quantitative survey with free text space for student feedback | [1] Cases based on routine encounters across different clinical settings | [1] articulate.com (bespoke creator tool)                                                                                                              | Student evaluation                                                                  | 49.5 to 82.5% response rates to case evaluations & 25.8% end of term response | Solving and interpreting e-learning cases close to real-life settings promoted students' motivation during the COVID-19 pandemic and may partially have compensated for bedside teaching opportunities. | Funded by clinician-scientist-program of the German Internal Medicine Society (DGIM).<br><br>No conflicts of interest |                                 |
| [2] Germany                                  |                                                                                                                                                                                |                                                             | [2] Post-test design                                    |                                                                                                                         | Communication                                    |                                                                      |                                                                          |                                                                                                                                                        |                                                                                     |                                                                               |                                                                                                                                                                                                         |                                                                                                                       |                                 |
| [3] PLOS One                                 |                                                                                                                                                                                | [2] 198                                                     |                                                         | [2] Not stated                                                                                                          |                                                  |                                                                      | Diagnostic thinking                                                      | [2] e-learning cases with quizzes & interaction modules with gamification                                                                              | Moodle LMS                                                                          |                                                                               |                                                                                                                                                                                                         |                                                                                                                       |                                 |
| [1] Redinger and Greene (2021) <sup>45</sup> | To describe the development, application & program evaluation of a virtual advanced emergency medicine (EM) curriculum developed rapidly in response to the COVID-19 pandemic. | [1] 4 <sup>th</sup> year Medical students on an EM rotation | [1] Traditional rotation from a previous cohort (n= 48) | [1] Not Specified                                                                                                       | History, physical, diagnosis & case presentation | Mixed methods                                                        | [1] 12 most common chief complaints in clinic                            | [1] Microsoft Teams                                                                                                                                    | Student performance (National Standardised EM Shelf Exam) – simplified to pass/fail | No difference between performance scores t(102) = 1.317<br>p = 0.174          | Students demonstrated the same levels of knowledge in the virtual & traditional rotations                                                                                                               | None                                                                                                                  |                                 |
| [2] USA                                      |                                                                                                                                                                                |                                                             |                                                         | [2] Kerns 6 step model for curriculum development                                                                       | Common diagnostic studies,                       |                                                                      |                                                                          |                                                                                                                                                        | MedEd Case X                                                                        |                                                                               |                                                                                                                                                                                                         |                                                                                                                       | Course evaluation (focus group) |
| [3] Western Journal of Emergency Medicine    |                                                                                                                                                                                | [2] 104                                                     | [2] Post-test exam scores compared between groups       |                                                                                                                         | Management plans,                                |                                                                      | Knowledge, indications / constraints & basic procedural skills.          | [2] Case series, radiology & ECG interpretation, textbooks, journal articles, podcasts, online board review, blog posts quizzes & a case presentation. | SAEM EM Curriculum                                                                  |                                                                               |                                                                                                                                                                                                         |                                                                                                                       |                                 |
|                                              |                                                                                                                                                                                |                                                             |                                                         |                                                                                                                         | Emergency recognition & management               |                                                                      | [3] 4 weeks                                                              | [2] Screen based                                                                                                                                       |                                                                                     |                                                                               |                                                                                                                                                                                                         |                                                                                                                       |                                 |

| Citation:                                | Purpose / aim                                                                                                                                                  | Population:                                                                                    | Study Design:                    | VSP Design                                            | Desired capabilities                                                                                                                       | Methodology                                  | Intervention:                                                                                                                                                                          | Delivery:                                                         | Student focussed outcome measures                                                                                        | Key Findings                                                                                                                                                                                                                                                                                                                                                                 | Conclusions/ Implications                                                                                                                                                                                                                                                                | Funding / Conflicts of interest |
|------------------------------------------|----------------------------------------------------------------------------------------------------------------------------------------------------------------|------------------------------------------------------------------------------------------------|----------------------------------|-------------------------------------------------------|--------------------------------------------------------------------------------------------------------------------------------------------|----------------------------------------------|----------------------------------------------------------------------------------------------------------------------------------------------------------------------------------------|-------------------------------------------------------------------|--------------------------------------------------------------------------------------------------------------------------|------------------------------------------------------------------------------------------------------------------------------------------------------------------------------------------------------------------------------------------------------------------------------------------------------------------------------------------------------------------------------|------------------------------------------------------------------------------------------------------------------------------------------------------------------------------------------------------------------------------------------------------------------------------------------|---------------------------------|
| Author (year) <sup>1</sup>               |                                                                                                                                                                | Profession (specialist rotation) <sup>1</sup>                                                  | Comparison groups <sup>1</sup>   | Stakeholders Involved <sup>1</sup>                    |                                                                                                                                            |                                              | Scenario(s) <sup>1</sup>                                                                                                                                                               | Software <sup>1</sup>                                             |                                                                                                                          |                                                                                                                                                                                                                                                                                                                                                                              |                                                                                                                                                                                                                                                                                          |                                 |
| Country <sup>2</sup>                     |                                                                                                                                                                |                                                                                                | pre / post measures <sup>2</sup> | Pedagogical Frameworks <sup>2</sup>                   |                                                                                                                                            |                                              | Activities <sup>2</sup>                                                                                                                                                                | Hardware <sup>2</sup>                                             |                                                                                                                          |                                                                                                                                                                                                                                                                                                                                                                              |                                                                                                                                                                                                                                                                                          |                                 |
| Publication <sup>3</sup>                 |                                                                                                                                                                | Sample Size <sup>2</sup>                                                                       |                                  |                                                       |                                                                                                                                            |                                              | Duration <sup>3</sup>                                                                                                                                                                  |                                                                   |                                                                                                                          |                                                                                                                                                                                                                                                                                                                                                                              |                                                                                                                                                                                                                                                                                          |                                 |
| [1] Samuelli et al. (2020) <sup>46</sup> | To review a diagnostic pathology selective for undergrad medical Students. Including the design, operation, evaluation, & suggestions for further adjustments. | [1] 3 <sup>rd</sup> and 4 <sup>th</sup> year medical students (diagnostic pathology selective) | [1] Single group                 | [1] Course coordinator                                | Introduce surgical pathology                                                                                                               | Quantitative Survey (with open text options) | [1] Principles of non-neoplastic (inflammatory) & neoplastic (benign/malignant) disorders, Dermatopathology, Breast pathology, Neoplastic neuropathology, Neoplastic thyroid pathology | [1] Zoom PowerPoint Moodle                                        | Student experience (previous exposure to pathology), Level of interest & learning from the course, Evaluation / feedback | 42% survey response rate, Participants new to diagnostic pathology instruction. Overall, the course was rated very favourably: 68% gave at least 3 out of 4 points for questions related to course interest, improved understanding of diseases & how strongly they would recommend the course. The key disadvantage as reported by 80% was tech issues accessing the slides | The course was a success and can be a model for future virtual pathology electives. Great effort should made to provide technical support to the students. The selective demonstrated value for students and provided much-needed exposure to diagnostic pathology in clinical practice. | None                            |
| [2] Israel                               |                                                                                                                                                                |                                                                                                | [2] Post-test measures           | [2] Kerns 6 step framework for curriculum development | Reinforce the pathological basis for disease, including mechanisms & treatments                                                            |                                              | Advanced topics in diagnostic pathology (NUT carcinoma, thyroid pathology)                                                                                                             | Whole slide image (WSI) viewers: (CaseViewer & Aperio ImageScope) |                                                                                                                          |                                                                                                                                                                                                                                                                                                                                                                              |                                                                                                                                                                                                                                                                                          |                                 |
| [3] Annals of Diagnostic Pathology       |                                                                                                                                                                | [2] 59                                                                                         |                                  |                                                       | Appreciate “the way a pathologist thinks,” & what they “mean” in their reports, as well as the significance of commonly described findings |                                              | [2] Self-assigned reading , lectures, slide reviews, diagnostic quiz                                                                                                                   | Library subscription (for assigned texts)                         |                                                                                                                          |                                                                                                                                                                                                                                                                                                                                                                              |                                                                                                                                                                                                                                                                                          |                                 |
|                                          |                                                                                                                                                                |                                                                                                |                                  |                                                       |                                                                                                                                            |                                              | [3] 2 weeks                                                                                                                                                                            | [2] Screen based                                                  |                                                                                                                          |                                                                                                                                                                                                                                                                                                                                                                              |                                                                                                                                                                                                                                                                                          |                                 |

| Citation:                                  | Purpose / aim                                                                                                                                                                                           | Population:                                                                           | Study Design:                                                           | VSP Design:                                         | Desired capabilities                       | Methodology                                                           | Intervention:                                                                                                                                                                                                                                                             | Delivery:                                                                                                                                | Student focussed outcome measures                                | Key Findings                                                                                                                                                                                                                                                                                                           | Conclusions/ Implications                                                                                                                     | Funding / Conflicts of interest                |
|--------------------------------------------|---------------------------------------------------------------------------------------------------------------------------------------------------------------------------------------------------------|---------------------------------------------------------------------------------------|-------------------------------------------------------------------------|-----------------------------------------------------|--------------------------------------------|-----------------------------------------------------------------------|---------------------------------------------------------------------------------------------------------------------------------------------------------------------------------------------------------------------------------------------------------------------------|------------------------------------------------------------------------------------------------------------------------------------------|------------------------------------------------------------------|------------------------------------------------------------------------------------------------------------------------------------------------------------------------------------------------------------------------------------------------------------------------------------------------------------------------|-----------------------------------------------------------------------------------------------------------------------------------------------|------------------------------------------------|
| Author (year) <sup>1</sup>                 |                                                                                                                                                                                                         | Profession (specialist rotation) <sup>1</sup>                                         | Comparison groups <sup>1</sup>                                          | Stakeholders Involved <sup>1</sup>                  |                                            |                                                                       | Scenario(s) <sup>1</sup>                                                                                                                                                                                                                                                  | Software <sup>1</sup>                                                                                                                    |                                                                  |                                                                                                                                                                                                                                                                                                                        |                                                                                                                                               |                                                |
| Country <sup>2</sup>                       |                                                                                                                                                                                                         |                                                                                       | pre / post measures <sup>2</sup>                                        | Pedagogical Framework <sup>2</sup>                  |                                            |                                                                       | Activities <sup>2</sup>                                                                                                                                                                                                                                                   | Hardware <sup>2</sup>                                                                                                                    |                                                                  |                                                                                                                                                                                                                                                                                                                        |                                                                                                                                               |                                                |
| Publication <sup>3</sup>                   |                                                                                                                                                                                                         | Sample Size <sup>2</sup>                                                              |                                                                         |                                                     |                                            |                                                                       | Duration <sup>3</sup>                                                                                                                                                                                                                                                     |                                                                                                                                          |                                                                  |                                                                                                                                                                                                                                                                                                                        |                                                                                                                                               |                                                |
| [1] Smith and Jones (2023) <sup>47</sup>   | Provide an elective that enables students to make the current clinical world relevant, cover key content to assure intern preparedness & explore how COVID-19 changed one key area of medical practice. | [1] 4 <sup>th</sup> year Medical students                                             | [1] Single group                                                        | [1] Academics and professional support (clinicians) | Clinical communication                     | Mixed                                                                 | [1] Atrial fibrillation, depression, hypertension, prone ventilation, using protective equipment, lung ultrasound. COVID Global health, public health, child health, aged care, legal & ethical, general practice. Primary care, mental health & evidence-based practice. | [1] Microsoft Teams PowerPoint OSLER (logging of progress & assessment) National Prescribing Service (NPS) modules COVID online modules. | Evaluation survey with Likert responses and open-ended questions | 32% response rate. Overall worked well, was well coordinated & a good option for a disrupted placement. The project options met their needs very well & were well supervised. More guidance asked for on COVID information & academic writing support for publication. Some found the OSLER and NPS modules a bit dry. | The COVID-19 elective was successful in meeting student learning needs & alleviated the concerns of students whose placements were disrupted. | No external funding and no competing interests |
| [2] Australia                              |                                                                                                                                                                                                         | [2] 250                                                                               | [2] Post-test design                                                    | [2] Not mentioned                                   | To author case studies of COVID approaches |                                                                       | [2] Podcasts, case studies, flipped classrooms, tutorials & modules                                                                                                                                                                                                       | [2] Screen based                                                                                                                         |                                                                  |                                                                                                                                                                                                                                                                                                                        |                                                                                                                                               |                                                |
| [3] BMC Medical Education                  |                                                                                                                                                                                                         |                                                                                       |                                                                         |                                                     |                                            |                                                                       | [3] 6 weeks (200 hrs)                                                                                                                                                                                                                                                     |                                                                                                                                          |                                                                  |                                                                                                                                                                                                                                                                                                                        |                                                                                                                                               |                                                |
| [1] Steehler et al. (2021) <sup>48</sup>   | To develop and evaluate a virtual otolaryngology elective created during COVID-19. To teach the basics of otolaryngology & increase exposure to the specialty                                           | [1] 3 <sup>rd</sup> & 4 <sup>th</sup> Medical students (head & neck surgery rotation) | [1] Single group                                                        | [1] Faculty, residents and senior medical students  | Pathophysiology                            | Mixed methods                                                         | [1] Rhinology, otology, facial plastic & reconstructive, laryngology, paediatric otolaryngology, imaging, & emergencies.                                                                                                                                                  | [1] Zoom                                                                                                                                 | Test scores (pre & post for n=5)<br><br>Student evaluation       | 92% reported increased understanding & interest in the field<br><br>Increase in knowledge test scores (p=0.001).                                                                                                                                                                                                       | An virtual otolaryngology elective format can be effective at providing an educational experience & garnering interest                        | None                                           |
| [2] USA                                    |                                                                                                                                                                                                         |                                                                                       | [2] Repeated measures design (for n=5 pre & post knowledge test scores) | [2] Not mentioned                                   | Workup                                     |                                                                       | [2] Orientation, anatomy/examination & surgical videos, reading, lectures, case based learning, grand rounds & roundtable conversation                                                                                                                                    | [2] Screen based                                                                                                                         |                                                                  |                                                                                                                                                                                                                                                                                                                        |                                                                                                                                               |                                                |
| [3] Otolaryngology - Head and Neck Surgery |                                                                                                                                                                                                         |                                                                                       | [2] 12                                                                  |                                                     |                                            | Treatment of disease course<br><br>otolaryngology practice & referral |                                                                                                                                                                                                                                                                           | [2] Screen based                                                                                                                         |                                                                  |                                                                                                                                                                                                                                                                                                                        |                                                                                                                                               |                                                |
|                                            |                                                                                                                                                                                                         |                                                                                       |                                                                         |                                                     |                                            |                                                                       | [3] 1 week                                                                                                                                                                                                                                                                |                                                                                                                                          |                                                                  |                                                                                                                                                                                                                                                                                                                        |                                                                                                                                               |                                                |

| Citation:                                 | Purpose / aim                                                                                                                             | Population:                                                  | Study Design:                    | VSP Design:                                                                                                                                             | Desired capabilities                                     | Methodology   | Intervention:                                                                                                                                                | Delivery:                           | Student focussed outcome measures                                                            | Key Findings                                                                    | Conclusions/ Implications                                                                                               | Funding / Conflicts of interest                 |
|-------------------------------------------|-------------------------------------------------------------------------------------------------------------------------------------------|--------------------------------------------------------------|----------------------------------|---------------------------------------------------------------------------------------------------------------------------------------------------------|----------------------------------------------------------|---------------|--------------------------------------------------------------------------------------------------------------------------------------------------------------|-------------------------------------|----------------------------------------------------------------------------------------------|---------------------------------------------------------------------------------|-------------------------------------------------------------------------------------------------------------------------|-------------------------------------------------|
| Author (year) <sup>1</sup>                |                                                                                                                                           | Profession (specialist rotation) <sup>1</sup>                | Comparison group <sup>1</sup>    | Stakeholders Involved <sup>1</sup>                                                                                                                      |                                                          |               | Scenario(s) <sup>1</sup>                                                                                                                                     | Software <sup>1</sup>               |                                                                                              |                                                                                 |                                                                                                                         |                                                 |
| Country <sup>2</sup>                      |                                                                                                                                           |                                                              |                                  | Pedagogical frameworks <sup>2</sup>                                                                                                                     |                                                          |               | Activities <sup>2</sup>                                                                                                                                      | Hardware <sup>2</sup>               |                                                                                              |                                                                                 |                                                                                                                         |                                                 |
| Publication <sup>3</sup>                  |                                                                                                                                           | Sample Size <sup>2</sup>                                     | pre / post measures <sup>2</sup> |                                                                                                                                                         |                                                          |               | Duration <sup>3</sup>                                                                                                                                        |                                     |                                                                                              |                                                                                 |                                                                                                                         |                                                 |
| [1] Taylor et al. (2021) <sup>49</sup>    | To explore & discuss a simulated clinical placement, aimed at enhancing the learning experience to create effective, efficient clinicians | [1] 2st year Dietetics students                              | [1] Single group                 | [1] Not specified                                                                                                                                       | Knowledge, communication & professional practice domains | Mixed methods | [1] Not specified, but simulated patient journeys                                                                                                            | [1] 360 images                      | Student evaluation (questionnaire & focus group)                                             | 100% of the cohort passed the placement.                                        | Despite some concerns / issues, a virtual placement can be a useful, rich experience for the student.                   | Funding not mentioned. No conflicts of interest |
| [2] UK                                    |                                                                                                                                           | [2] 40                                                       | [2] Post-test design             | [2] Controlled reflective processes underpinned the online workbook                                                                                     |                                                          |               | [2] Statutory & mandatory training Virtual wards & mealtimes. Recordings, peer learning with structured activities, & an online workbook                     | Diet-COMMS                          | Web page metrics                                                                             | 360 images: Rated enjoyable & informative. Were accessed 1016 times             |                                                                                                                         |                                                 |
| [3] British Journal of Nursing            |                                                                                                                                           |                                                              |                                  | NHS & HCPC placement standards                                                                                                                          |                                                          |               | [3] 2 weeks                                                                                                                                                  | COVCollaborate App                  | Student results                                                                              |                                                                                 |                                                                                                                         |                                                 |
| [1] Villa et al. (2021) <sup>50</sup>     | To create, implement & evaluate a virtual clerkship with a focus on social emergency medicine (EM) & professional development             | [1] 4 <sup>th</sup> year Medical students on an EM Clerkship | [1] Single group                 | [1] Clerkship director, associate programme directors, medical education fellows and senior EM residents. Needs assessment of post graduate near peers. | Advanced medical Knowledge                               | Mixed methods | [1] Paediatric anaphylaxis, motorcycle trauma, hypothermia & abdominal aortic aneurysm Themes: language, incarceration, gender identity, race & homelessness | [1] Zoom                            | Pre & post knowledge tests                                                                   | 75% & 96% survey response rates: post-module & end-rotation                     | A virtual EM visiting clerkship is feasible, supports knowledge acquisition & is perceived as valuable by participants. | None                                            |
| [2] USA                                   |                                                                                                                                           |                                                              | [2] Repeated measures design     |                                                                                                                                                         | Social determinants of health                            |               |                                                                                                                                                              | Foundations of EM (online resource) | Survey evaluations:                                                                          | Modest gains in knowledge scores (p=0.006, effect size: 0.68, 95% CI 0.12-1.24) |                                                                                                                         |                                                 |
| [3] Western Journal of Emergency Medicine |                                                                                                                                           | [2] 26                                                       |                                  |                                                                                                                                                         | Professional development                                 |               |                                                                                                                                                              | IDHEAL modules                      | Overall attitude to the course                                                               | 89% strongly agreed: topics were important.                                     | Virtual learning experiences may be valuable in the future as an adjunct to traditional in-person rotations.            |                                                 |
|                                           |                                                                                                                                           |                                                              |                                  |                                                                                                                                                         | Professional identity formation.                         |               |                                                                                                                                                              | [2] Screen based                    | After each module x 5 (to determine the comfort with applying content to a clinical setting) | 95% strongly agreed /agreed: rotation should be repeated                        |                                                                                                                         |                                                 |
|                                           |                                                                                                                                           |                                                              |                                  |                                                                                                                                                         | Framework for maximising online learning                 |               |                                                                                                                                                              |                                     |                                                                                              | Positive feedback for course design, but zoom fatigue was mentioned.            |                                                                                                                         |                                                 |
|                                           |                                                                                                                                           |                                                              |                                  |                                                                                                                                                         |                                                          |               | [2] Assignments (using websites & podcasts), small group didactic sessions, student led teaching, virtual escape rooms & book club.                          |                                     |                                                                                              |                                                                                 |                                                                                                                         |                                                 |
|                                           |                                                                                                                                           |                                                              |                                  |                                                                                                                                                         |                                                          |               | [3] 2 weeks                                                                                                                                                  |                                     |                                                                                              |                                                                                 |                                                                                                                         |                                                 |

| Citation:                                       | Purpose / aim                                                                                                                                            | Population:                                                                                                         | Study Design:                                                                                   | VSP Design:                                                                                                                                                                       | Desired capabilities                                                                                                                                                                                                                                                          | Methodology  | Intervention:                                                                                                                                                                                                             | Delivery:                                                                                                                                                                                                                                                                                                    | Student focussed outcome measures                    | Key Findings                                                                                                                                                                                                                         | Conclusions/ Implications                                                                                                                                                                                                                                                                 | Funding / Conflicts of interest |
|-------------------------------------------------|----------------------------------------------------------------------------------------------------------------------------------------------------------|---------------------------------------------------------------------------------------------------------------------|-------------------------------------------------------------------------------------------------|-----------------------------------------------------------------------------------------------------------------------------------------------------------------------------------|-------------------------------------------------------------------------------------------------------------------------------------------------------------------------------------------------------------------------------------------------------------------------------|--------------|---------------------------------------------------------------------------------------------------------------------------------------------------------------------------------------------------------------------------|--------------------------------------------------------------------------------------------------------------------------------------------------------------------------------------------------------------------------------------------------------------------------------------------------------------|------------------------------------------------------|--------------------------------------------------------------------------------------------------------------------------------------------------------------------------------------------------------------------------------------|-------------------------------------------------------------------------------------------------------------------------------------------------------------------------------------------------------------------------------------------------------------------------------------------|---------------------------------|
| Author (year) <sup>1</sup>                      |                                                                                                                                                          | Profession (specialist rotation) <sup>1</sup>                                                                       | Comparison group <sup>1</sup>                                                                   | Stakeholders Involved                                                                                                                                                             |                                                                                                                                                                                                                                                                               |              | Scenario(s) <sup>1</sup>                                                                                                                                                                                                  | Software <sup>1</sup>                                                                                                                                                                                                                                                                                        |                                                      |                                                                                                                                                                                                                                      |                                                                                                                                                                                                                                                                                           |                                 |
| Country <sup>2</sup>                            |                                                                                                                                                          |                                                                                                                     |                                                                                                 | Pedagogical framework                                                                                                                                                             |                                                                                                                                                                                                                                                                               |              | Activities <sup>2</sup>                                                                                                                                                                                                   | Hardware <sup>2</sup>                                                                                                                                                                                                                                                                                        |                                                      |                                                                                                                                                                                                                                      |                                                                                                                                                                                                                                                                                           |                                 |
| Publication <sup>2</sup>                        |                                                                                                                                                          | Sample Size <sup>2</sup>                                                                                            | pre / post measures <sup>2</sup>                                                                |                                                                                                                                                                                   |                                                                                                                                                                                                                                                                               |              | Duration <sup>3</sup>                                                                                                                                                                                                     |                                                                                                                                                                                                                                                                                                              |                                                      |                                                                                                                                                                                                                                      |                                                                                                                                                                                                                                                                                           |                                 |
| [1] Weston & Zauche (2021) <sup>51</sup>        | To compare the Assessment Technologies Institute (ATI) scores of students who completed their practicum in person versus virtually                       | [1] 2 <sup>nd</sup> Semester prelicensure baccalaureate nursing students on a paediatric clinical course<br>[2] 186 | [1] In-person placement (clinic & simulation) comparator group (n=93)<br>[2] Post-test measures | [1] Not specified<br>[2] Not mentioned                                                                                                                                            | Take a history<br>Perform physical assessment<br>Identify problems<br>Prioritise interventions<br>Integrate foundation knowledge                                                                                                                                              | Quantitative | [1] Physical assessment, sickle cell, cystic fibrosis, infectious respiratory disease, head injury, cardiovascular disease<br>[2] Prebrief, i-Human cases, debrief in groups & quizzes<br>[3] 5 weeks                     | [1] Online conferencing (not specified)<br>i-Human<br>[2] Screen based                                                                                                                                                                                                                                       | Scores on the ATI exam                               | No difference between the scores on the ATI exam between groups<br>t(184)=0.700 (p=0.485)                                                                                                                                            | Using the i-Human platform with prebriefing & debriefing, is an effective approach to simulating a pediatric clinical practice                                                                                                                                                            | Not stated                      |
| [2] USA                                         |                                                                                                                                                          |                                                                                                                     |                                                                                                 |                                                                                                                                                                                   |                                                                                                                                                                                                                                                                               |              |                                                                                                                                                                                                                           |                                                                                                                                                                                                                                                                                                              |                                                      |                                                                                                                                                                                                                                      |                                                                                                                                                                                                                                                                                           |                                 |
| [3] Archives of Pathology & Laboratory Medicine | To develop & implement a digital slide-based virtual surgical pathology elective in response to the temporary suspension of in person clinical rotations | [1] Medical students (Pathology rotation)<br>[2] 43                                                                 | [1] Single group<br>[2] Post measures design                                                    | [1] Course director (and a needs assessment from student evaluations and rotation data over the proceeding 5 year period)<br>[2] Kern's 6 step approach to curriculum development | Summarise the role of a general surgical pathologist.<br>List the defining histologic features of several common pathologies.<br>Demonstrate how to determine the pathologic stage for an oncologic resection<br>Describe how to approach the assessment of a biopsy specimen | Quantitative | [1] Benign & Malignant neoplasms. Non-neoplastic, developmental & inflammatory processes<br>[2] Reading (e-texts), e-lectures, virtual slides, quizzes, gross dissection videos, student led presentations<br>[3] 3 weeks | [1] Zoom PowerPoint Blackboard (LMS) Inversus (Open EdX platform) Internal education web page: hosted the GI pathology module (designed using iSpring Suite 9) & videos. Leica Aperio & Roche iScan (for slide digitisation). Concentriq (for slide delivery). Amazon Web Cloud storage.<br>[2] Screen based | Pass / fail assessment.<br>Student evaluation survey | All students passed the assessment.<br>39.5% survey response rate.<br>Learning objectives, patient variety, effective teaching / feedback, the value of technology & the quality of the educational experience were all highly rated | Provided a meaningful clinical experience in a time of online education need.<br>Added benefits included increased medical student exposure to pathology as a medical specialty & demonstration of how digital slides can potentially improve standardisation of the pathology clerkship. | None                            |



| Citation                             | Purpose / aim                                                                                                         | Population                                                  | Study Design                                                  | VSP Design                                                                                          | Desired capabilities                                                                  | Methodology  | Intervention:                                                  | Delivery:                            | Student focussed outcome measures   | Key Findings                                                                                                                                                                    | Conclusions/ Implications                                                                                                                                                                        | Funding / Conflicts of interest |
|--------------------------------------|-----------------------------------------------------------------------------------------------------------------------|-------------------------------------------------------------|---------------------------------------------------------------|-----------------------------------------------------------------------------------------------------|---------------------------------------------------------------------------------------|--------------|----------------------------------------------------------------|--------------------------------------|-------------------------------------|---------------------------------------------------------------------------------------------------------------------------------------------------------------------------------|--------------------------------------------------------------------------------------------------------------------------------------------------------------------------------------------------|---------------------------------|
| Author (year) <sup>1</sup>           |                                                                                                                       | Profession (specialist rotation) <sup>1</sup>               | Comparison group <sup>1</sup>                                 | Stakeholders Involved                                                                               |                                                                                       |              | Scenario(s) <sup>1</sup>                                       | Software <sup>1</sup>                |                                     |                                                                                                                                                                                 |                                                                                                                                                                                                  |                                 |
| Country <sup>2</sup>                 |                                                                                                                       |                                                             |                                                               | Pedagogical framework                                                                               |                                                                                       |              | Activities <sup>2</sup>                                        | Hardware <sup>2</sup>                |                                     |                                                                                                                                                                                 |                                                                                                                                                                                                  |                                 |
| Publication <sup>3</sup>             |                                                                                                                       | Sample Size <sup>2</sup>                                    | pre / post measures <sup>2</sup>                              |                                                                                                     |                                                                                       |              | Duration <sup>3</sup>                                          |                                      |                                     |                                                                                                                                                                                 |                                                                                                                                                                                                  |                                 |
| [1] Zhou et al. (2020) <sup>55</sup> | To observe & analyse the application of Massive Open Online Course (MOOC) & micro video during the COVID-19 epidemic. | [1] Trainee nurses on an Emergency Department (ED) rotation | [1] in-person (traditional) placement comparator group (n=30) | [1] Nursing Skills Group, including a teaching supervisor, clinical nursing expert & a photographer | Theoretical & practical skills with COVID-19 prevention & protection level strategies | Quantitative | [1] Operation of specialised nursing skills involved in the ED | [1] The ED network training platform | Theoretical & practical exam scores | There was no significant difference in exam scores between groups                                                                                                               | Combined mode of MOOC micro-video can present theoretical and practical courses in a unique way, & is a better alternative when face-to-face and practical courses can no longer be carried out. | None                            |
| [2] China                            |                                                                                                                       |                                                             |                                                               |                                                                                                     |                                                                                       |              | [2] MOOC & Micro Video course                                  | MOOC (based on the textbook)         | Student evaluation                  | 100% survey response rate                                                                                                                                                       |                                                                                                                                                                                                  |                                 |
| [3] Telemedicine and e-health        |                                                                                                                       | [2] 60                                                      | [2] Post-test measures                                        | [2] Content was based on the syllabus of the Emergency & Critically Ill Nursing textbook            |                                                                                       |              | [3] 2 weeks                                                    | [2] Screen based                     |                                     | Overall satisfaction, degree of easy understanding, teacher evaluation & learning results group were higher in the experimental group, with statistical significance (p < 0.05) |                                                                                                                                                                                                  |                                 |
