# Supplementary material for: Virtual Simulated Placements in Healthcare Education: A scoping review
Source: bioRxiv or medRxiv preprint supplement (doi:10.1101/2023.10.12.23296932), 2023-10-12
Supplement: Supplementary file [file media-7.pdf]

## Supplementary File A6: – Papers by Professions

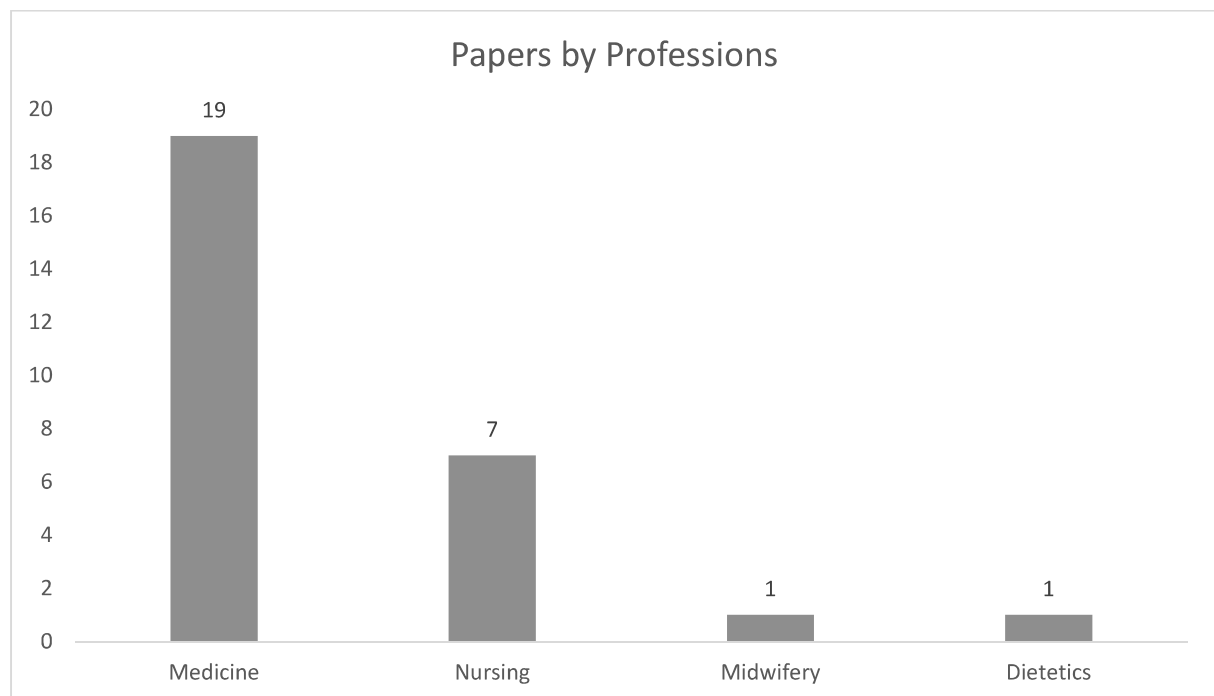

### Breakdown by Medical Specialty

|                      |   |
|----------------------|---|
| Radiology            | 4 |
| Emergency            | 2 |
| Pathology            | 2 |
| Anaesthesiology      | 1 |
| GP                   | 1 |
| Internal Medicine    | 2 |
| Neurology            | 1 |
| Orthopaedics         | 1 |
| Otolaryngology (ENT) | 1 |
| Urology              | 1 |
| None                 | 1 |
| Multiple             | 2 |

### Breakdown by Nursing Specialty

|             |   |
|-------------|---|
| Paediatrics | 2 |
| Community   | 1 |
| Emergency   | 1 |
| Psychiatric | 1 |
| Multiple    | 1 |
| None        | 1 |
