# Supplementary material for: Virtual Simulated Placements in Healthcare Education: A scoping review
Source: bioRxiv or medRxiv preprint supplement (doi:10.1101/2023.10.12.23296932), 2023-10-12
Supplement: Supplementary file [file media-9.pdf]

## Supplementary File A7: Conceptual Frameworks

| Underpinning Concepts           | Type of concept                                                              | Papers                                                                                                                                                                                          |
|---------------------------------|------------------------------------------------------------------------------|-------------------------------------------------------------------------------------------------------------------------------------------------------------------------------------------------|
| Pedagogy                        | Student centred learning                                                     | Luo et al. (2021) <sup>41</sup>                                                                                                                                                                 |
|                                 | Andragogy                                                                    | Bhaysham and Dyer (2020) <sup>29</sup><br>Creagh et al. (2021) <sup>30</sup>                                                                                                                    |
|                                 | Problem based learning                                                       | Bhaysham and Dyer (2020) <sup>29</sup><br>Creagh et al. (2021) <sup>30</sup><br>Kasai et al. (2021) <sup>39</sup>                                                                               |
|                                 | Experiential learning                                                        | Creagh et al. (2021) <sup>30</sup>                                                                                                                                                              |
|                                 | Reflective practices                                                         | Taylor et al. (2021) <sup>49</sup>                                                                                                                                                              |
|                                 | Online learning                                                              | Fehl et al. (2022) <sup>33</sup><br>Villa et al. (2021) <sup>50</sup>                                                                                                                           |
| Theoretical Frameworks          | VSP development                                                              | Ganji et al. (2022) <sup>34</sup>                                                                                                                                                               |
|                                 | Curriculum development                                                       | Nguyen et al. (2023) <sup>43</sup><br>Redinger and Greene (2021) <sup>45</sup><br>Samueli et al. (2020) <sup>46</sup><br>Villa et al. (2021) <sup>50</sup><br>White et al. (2021) <sup>52</sup> |
| Standards or Existing curricula | International Nursing Association for clinical simulation and learning (USA) | Kubin et al. (2021) <sup>40</sup>                                                                                                                                                               |
|                                 | National Standards for Nursing Undergraduates (China)                        | Luo et al. (2021) <sup>41</sup>                                                                                                                                                                 |
|                                 | NHS and HCPC Placement standards (UK)                                        | Taylor et al. (2021) <sup>49</sup>                                                                                                                                                              |
|                                 | Urological Association of Medical Students Curriculum (USA)                  | Williams et al. (2021) <sup>54</sup>                                                                                                                                                            |
|                                 | Syllabus of the Emergency and Critically Ill Nursing Textbook (China)        | Zhou et al. (2020) <sup>55</sup>                                                                                                                                                                |
