# Supplementary material for: Virtual Simulated Placements in Healthcare Education: A scoping review
Source: bioRxiv or medRxiv preprint supplement (doi:10.1101/2023.10.12.23296932), 2023-10-12
Supplement: Supplementary file [file media-10.pdf]

## Supplementary File A8: Bespoke Healthcare Technology

| Type of Resource                                                                               | Name of Resource                                                        | Papers                                                                                                      |                                     |
|------------------------------------------------------------------------------------------------|-------------------------------------------------------------------------|-------------------------------------------------------------------------------------------------------------|-------------------------------------|
| Commercial Software<br>(Virtual cases)                                                         | Aquifer                                                                 | Creagh et al. (2021) <sup>30</sup><br>Durfee et al. (2020) <sup>32</sup>                                    |                                     |
|                                                                                                | Body Interact                                                           | De Ponti et al. (2020) <sup>31</sup>                                                                        |                                     |
|                                                                                                | vSim                                                                    | Joung and Kang (2022) <sup>38</sup><br>Kubin et al. (2021) <sup>40</sup><br>Luo et al. (2021) <sup>41</sup> |                                     |
|                                                                                                | NurseThink vClinical                                                    | Kubin et al. (2021) <sup>40</sup>                                                                           |                                     |
|                                                                                                | F.A. Davis Paediatric Interactive<br>Clinical Scenarios for RNs         | Kubin et al. (2021) <sup>40</sup>                                                                           |                                     |
|                                                                                                | i-Human                                                                 | Weston and Zauche (2021) <sup>51</sup>                                                                      |                                     |
|                                                                                                | Sentinel City                                                           | Wik et al. (2022) <sup>53</sup>                                                                             |                                     |
|                                                                                                | Online modules/training                                                 | Cleveland Clinic Paediatric<br>Radiology Modules                                                            | Gomez et al. (2020) <sup>35</sup>   |
| Virtual Healthcare Experience                                                                  |                                                                         | Kubin et al. (2021) <sup>40</sup>                                                                           |                                     |
| National Prescribing Module                                                                    |                                                                         | Smith and Jones (2023) <sup>47</sup>                                                                        |                                     |
| Online MedEd CaseX                                                                             |                                                                         | Redinger and Greene (2021) <sup>45</sup>                                                                    |                                     |
| Emergency Medicine Reviews<br>and Perspectives                                                 |                                                                         | Redinger and Greene (2021) <sup>45</sup>                                                                    |                                     |
| Diet-COMMS                                                                                     |                                                                         | Taylor et al. (2021) <sup>49</sup>                                                                          |                                     |
| IDHEAL Modules                                                                                 |                                                                         | Villa et al. (2021) <sup>50</sup>                                                                           |                                     |
| Foundations of EM<br>Scientific Foundations of<br>Medicine (SFM) histology and<br>pathobiology |                                                                         | White et al. (2021) <sup>52</sup>                                                                           |                                     |
| Custom built sites/apps                                                                        | Gastrointestinal (GI) Pathology                                         |                                                                                                             |                                     |
|                                                                                                | Internal trainee education page                                         | White et al. (2021) <sup>52</sup>                                                                           |                                     |
|                                                                                                | Google Sites                                                            | Kubin et al. (2021) <sup>40</sup>                                                                           |                                     |
|                                                                                                | Articulate.com                                                          | Rahm et al. (2021) <sup>44</sup>                                                                            |                                     |
|                                                                                                | 360 images                                                              | Taylor et al. (2021) <sup>49</sup>                                                                          |                                     |
| Online resources                                                                               | The ED Network Training<br>Platform                                     | Zhou et al. (2021) <sup>55</sup>                                                                            |                                     |
|                                                                                                | Pacsbin<br>TeamRads.com<br>LearningRadiology.com<br>CTisUs.com          | Gomez et al. (2020) <sup>35</sup>                                                                           |                                     |
|                                                                                                | High Value Practice Academic<br>Alliance Ordering Wisely E-<br>Lectures |                                                                                                             |                                     |
|                                                                                                | One Night in the ED                                                     | Gomez et al. (2020) <sup>35</sup><br>Redinger and Greene (2021) <sup>45</sup>                               |                                     |
|                                                                                                | Sublux Radiology                                                        | Redinger and Greene (2021) <sup>45</sup>                                                                    |                                     |
|                                                                                                | John Hopkins Surgical<br>Pathology (login required)                     | White et al. (2021) <sup>52</sup>                                                                           |                                     |
|                                                                                                | Whole slide image viewers                                               | Concentriq                                                                                                  |                                     |
|                                                                                                |                                                                         | CaseViewer                                                                                                  | Samueli et al. (2020) <sup>46</sup> |
| Aperio ImageScope                                                                              |                                                                         |                                                                                                             |                                     |
